## 17 **ABSTRACT**

18 The gradual accumulation of sensory evidence is a crucial component of perceptual decision  
19 making, but its neural mechanisms are still poorly understood. Given the wide availability of  
20 genetic and optical tools for mice, they can be useful model organisms for the study of these  
21 phenomena; however, behavioral tools are largely lacking. Here, we describe a new  
22 evidence-accumulation task for head-fixed mice navigating in a virtual reality environment. As  
23 they navigate down the stem of a virtual T-maze, they see brief pulses of visual evidence on  
24 either side, and retrieve a reward on the arm with the highest number of pulses. The pulses occur  
25 randomly with Poisson statistics, yielding a diverse yet well-controlled stimulus set, making the  
26 data conducive to a variety of computational approaches. A large number of mice of different  
27 genotypes were able to learn and consistently perform the task, at levels similar to rats in  
28 analogous tasks. They are sensitive to side differences of a single pulse, and their memory of the  
29 cues is stable over time. Moreover, using non-parametric as well as modeling approaches, we  
30 show that the mice indeed accumulate evidence: they use multiple pulses of evidence from  
31 throughout the cue region of the maze to make their decision, albeit with a small overweighting  
32 of earlier cues, and their performance is affected by the magnitude but not the duration of  
33 evidence. Additionally, analysis of the mice's running patterns revealed that trajectories are fairly  
34 stereotyped yet modulated by the amount of sensory evidence, suggesting that the navigational  
35 component of this task may provide a continuous readout correlated to the underlying cognitive  
36 variables. Our task, which can be readily integrated with state-of-the-art techniques, is thus a  
37 valuable tool to study the circuit mechanisms and dynamics underlying perceptual decision  
38 making, particularly under more complex behavioral contexts.

## 39 **INTRODUCTION**

40 Making decisions based on noisy or ambiguous sensory evidence is a task animals must face on a  
41 daily basis. Take, for instance, a mouse in the wild, whose navigation behavior relies on vision  
42 (Alyan and Jander, 1994/8; Etienne et al., 1996; Stopka and Macdonald, 2003). Amidst tall grass,  
43 deciding a route to a partially occluded food source (say, a corn plant) might require gradual  
44 accumulation of visual evidence, i.e. short glimpses of what may or may not be part of that plant.  
45 This example also highlights another important point about decision-making, namely that it is  
46 often performed in conjunction with other complex behaviors and can itself be a dynamic  
47 process occurring over seconds-long timescales. Here, the mouse must find its food source while  
48 navigating in a potentially changing environment; the corn plant may turn out to be a scarecrow,  
49 and evidence for or against this is typically used to interactively update a motor plan.

50 How the brain gradually accumulates sensory evidence has been the topic of extensive studies  
51 performed primarily in primates (Gold and Shadlen, 2007). However, much remains unknown  
52 regarding which brain areas are involved, and the specific circuit mechanisms and dynamics  
53 underlying this computation (Brody and Hanks, 2016). More recently, several groups have  
54 started using rodents to tackle such questions (Brunton et al., 2013; Carandini and Churchland,  
55 2013; Hanks et al., 2015; Licata et al., 2017; Morcos and Harvey, 2016; Odoemene et al., 2017;  
56 Raposo et al., 2014; Scott et al., 2015). Rodents provide many complementary advantages to the

57 use of primates, such as lower cost, larger scalability, and, particularly for mice, the wide  
58 availability of an ever-expanding arsenal of tools to record from and manipulate circuits with  
59 great spatiotemporal and genetic specificity in behaving animals (Chen et al., 2013; Deisseroth,  
60 2011; Dombek et al., 2007; Guo et al., 2014; Luo et al., 2008; Rickgauer et al., 2014; Sofroniew  
61 et al., 2016; Song et al., 2017; Svoboda and Yasuda, 2006).

62 Motivated by the above, we have developed a novel behavioral task in which head-fixed mice  
63 are required to gradually accumulate visual evidence as they navigate in a virtual T-maze. The  
64 side on which the majority of the evidence appears informs them of which of the two arms the  
65 reward is located in. Compared to freely moving behaviors, the use of virtual reality (VR)  
66 (Harvey et al., 2009) allows for better control of sensory stimuli, ease of readout of motor output,  
67 and, crucially, the head fixation required for many state-of-the-art optical techniques (Dombek  
68 and Reiser, 2012; Minderer et al., 2016). In studying perceptual decision-making in conjunction  
69 with navigation, we emulate a more naturalistic context of rodent behavior. As brains are highly  
70 nonlinear systems that may engage qualitatively different mechanisms in different contexts,  
71 trying to approximate such conditions is arguably an important component towards  
72 understanding neural codes (Carew, 2005; Krakauer et al., 2017). Another highlight of our task is  
73 the use of multiple short pulses of sensory stimuli that are randomly distributed per trial  
74 according to Poisson statistics (Brunton et al., 2013; Scott et al., 2015). The diverse yet  
75 well-controlled nature of this stimulus set allows for the use of powerful computational  
76 approaches when analyzing the data (Brunton et al., 2013; Erlich et al., 2015; Hanks et al., 2015;  
77 Scott et al., 2015). Specifically, the stimuli are designed to be delivered in perceptually distinct  
78 pulses (“cues”), enabling neural recording and perturbation studies to trace/modulate precisely  
79 timed inputs into the animal’s brain. The randomized locations of the cues decorrelates the  
80 dynamics of evidence streams from the general progression of time, on a trial-by-trial basis,  
81 allowing us to investigate the distinct contributions of the amount and the timing of incoming  
82 evidence. This, in turn, gives us a better handle on the behavioral strategies the animals employ.

83 Here we perform a thorough characterization of various performance indicators, behavioral  
84 strategies and navigational aspects of the task, with the goal of providing a bedrock for future  
85 studies investigating the neural mechanisms underlying this behavior. We show that mice can  
86 consistently learn this task and solve it by using multiple pulses of visual cues distributed  
87 throughout the cue presentation period, thus accumulating evidence towards a decision.  
88 Moreover, we show that their performance is influenced by the magnitude of the evidence but  
89 not its duration. We also describe an intriguing, if small, tendency to alternate choices after  
90 rewards, and present logistic regression models that combine evidence and trial history as tools  
91 to quantify the behavior. Finally, we capitalize on the navigational component of the task and  
92 show that trajectories, though fairly stereotyped, may provide an ongoing readout correlated with  
93 cognitive variables.

## 94 MATERIALS AND METHODS

### 95 Animals and surgery

96 All procedures were approved by the Institutional Animal Care and Use Committee at Princeton  
97 University. Experiments were performed on both male and female mice aged 2 – 12 months,  
98 from several strains:

- 99 ● 5 wild types [C57BL6/J, Jackson Laboratories, stock # 000664]
- 100 ● 14 VGAT-ChR2-EYFP [B6.Cg-Tg(Slc32a1-COP4\*H134R/EYFP)8Gfng/J, Jackson  
101 Laboratories, stock # 014548] (Zhao et al., 2011).
- 102 ● 16 triple transgenic crosses expressing GCaMP6f under the CaMKII $\alpha$  promoter, from the  
103 following two lines: Ai93-D;CaMKII $\alpha$ -tTA [Igs7<sup>tm93.1(tetO-GCaMP6f)Hze</sup>  
104 Tg(Camk2a-tTA)1Mmay/J, Jackson Laboratories, stock # 024108] (Madisen et al., 2015);  
105 Emx1-IRES-Cre [B6.129S2-Emx1<sup>tm1(cre)Krl</sup>/J, Jackson Laboratories, stock # 005628]  
106 (Gorski et al., 2002).
- 107 ● 8 Thy1-GCaMP6f [C57BL/6J-Tg(Thy1-GCaMP6f)GP5.3Dkim/J, Jackson Laboratories,  
108 stock # 028280] (Dana et al., 2014).
- 109 ● 1 Thy1-YFP-H [B6.Cg-Tg(Thy1-YFP)HJrs/J, Jackson Laboratories, stock # 003782]  
110 (Feng et al., 2000).
- 111 ● 6 DAT-IRES-CRE [B6.SJL-*Slc6a3tm1.1(cre)Bknn*/J, Jackson Laboratories, stock # 006660]  
112 (Bäckman et al., 2006).

113 The various strains were part of different ongoing, unpublished studies, and are hereby grouped  
114 for behavioral analysis. Despite happening for technical reasons, the inclusion of and  
115 comparisons between different strains also allowed us to confirm that we can obtain comparable  
116 levels of behavioral performance across separate experiments and different experimenters. The  
117 mice underwent sterile stereotaxic surgery to implant a custom lightweight titanium headplate  
118 (~1 g, CAD design files available at <https://github.com/sakoay/AccumTowersTools.git>) under  
119 isoflurane anesthesia (2.5% for induction, 1.5% for maintenance). Briefly, after asepsis the skull  
120 was exposed and the periosteum removed using a bonn micro probe (Fine Science Tools) or  
121 sterile cotton swabs. The headplate was then positioned over the skull and affixed to it using  
122 metabond cement (Parkell). Some of the animals underwent additional procedures to either  
123 implant an imaging cranial window or make the skull optically transparent, as previously  
124 described (Guo et al., 2014; Harvey et al., 2012). Additionally, in the DAT-cre mice only,  
125 AAV5-EF1a-DIO-hChR2 (Penn Vector Core) was injected bilaterally in the ventral tegmental  
126 area (VTA) following standard biosafety level 1 procedures, and 300- $\mu$ m optical fibers  
127 (Thorlabs) were implanted bilaterally above the VTA. The virus was injected as part of a  
128 separate study. The animals received one pre-operative dose of meloxicam for analgesia (1  
129 mg/kg I.P. or S.C.) and another one 24h later, as well as peri-operative body-temperature I.P.  
130 saline injections to maintain hydration. Body temperature was maintained constant using a  
131 homeothermic control system (Harvard Apparatus). For cranial window implantation surgeries  
132 only, an intraperitoneal injection of dexamethasone (2-5 mg/kg) was given at the beginning of  
133 the procedure in order to reduce brain swelling. The mice were allowed to recover for at least 3  
134 days before starting water restriction for behavioral training. They were then restricted to an  
135 allotted water volume of 1 – 2 mL per day, always ensuring that no clinical signs of dehydration

136 were present and body mass was at least 80% of the initial value. If any of these conditions were  
137 not met, the mice received supplemental water (or had *ad libitum* access to water if more than  
138 mildly dehydrated) until recovering. Most typically, animals received their whole allotment  
139 during behavioral training, but received supplemental water if necessary, at least one hour after  
140 the end of training.

141 The animals were handled daily from the start of water restriction until they no longer showed  
142 any signs of distress, such as attempting to escape, defecating or urinating, which typically took  
143 3 – 5 days. Mice were never picked up from the cage by their tails, instead voluntarily climbing  
144 onto the experimenter's hand or being gently lifted with a hand scooping movement. They were  
145 allowed to socialize in an enclosed enriched environment (~0.3 m<sup>2</sup>, with 5–10 mice) outside of  
146 behavioral sessions and before being returned to the vivarium at the end of each day.

## 147 **Behavioral task**

148 **Apparatus.** We trained mice on virtual reality (VR) systems similar to ones described previously  
149 (Harvey et al., 2012; Low et al., 2014)(**Figure 1A**). Subjects were head-fixed using custom-made  
150 headplate holders and stood on a spherical treadmill comprised of a Styrofoam® ball (8-inch  
151 diameter, Smoothfoam) placed on a custom 3D-printed cup and suspended by compressed air (60  
152 – 65 p.s.i.). Compressed air was delivered through a 1.5 inch-diameter flexible hose  
153 (McMaster-Carr) coupled to an enclosed chamber beneath the cup. The source of air to this hose  
154 was first passed through a laminar flow nozzle (series 600 Whisperblast, Lechler), which  
155 dramatically reduced ambient noise by reducing air turbulence. The animals were placed on the  
156 ball such that their snouts were roughly aligned with the center of its upper surface, and at a  
157 height such that they could touch the ball with their whole forepaw pads, while not displaying  
158 noticeable hunching. This allowed them to run comfortably, with similar posture to when they  
159 are freely moving. A custom alignment tool that was mounted on the posts supporting the  
160 headplate holders was used to verify the mice's alignment with respect to VR system, and was  
161 critical to prevent side biases stemming from lateral asymmetries in controlling the ball (a CAD  
162 file for 3D printing the tool is available at <https://github.com/sakoay/AccumTowersTools.git>).

163 Ball movements controlled the mice's position within the VR environment, projected onto a  
164 custom-built Styrofoam® toroidal screen with a 270° horizontal field of view, using a DLP  
165 projector (Optoma HD 141X) with a refresh rate of 120 Hz, a pixel resolution of 1024 × 768, and  
166 relative color balance of 0, 0.4 and 0.5, for the red, green and blue channels, respectively. Motion  
167 was detected by an optical flow sensor (ADNS-3080 Optical Flow Sensor APM2.6), coupled to  
168 infrared LED (890 nm, Digikey), and lying underneath the ball, within the cup on which the ball  
169 sat, which contained a 30-mm aperture covered with Gorilla Glass® (Edmond Optics). Optical  
170 flow was transformed into displacement and output to the behavior control PC using custom  
171 code running on an Arduino Due (code and documentation may be downloaded from  
172 <https://github.com/sakoay/AccumTowersTools.git>). The accuracy of this measurement depends  
173 on the presence of sufficiently high-contrast features on the ball surface. In order to ensure this,  
174 the styrofoam balls were either roughened with steel wool or small black marks were made  
175 crisscrossing the entire area using a permanent marker. Treadmill displacements in *X* and *Y* (d*X*,

176 dY) resulted in equal translational displacements in the VR environment (i.e. gain of 1). To set  
177 the virtual viewing angle  $\theta$ , the acute angle between the line formed by the displacement vector  
178 and the Y axis line was calculated as

$$\Theta = \text{atan2}(-dX \times \text{sign}(dY), |dY|)$$

179 The rate of change in  $\theta$  (radians/second) was then calculated using an exponential gain function  
180 of  $\Theta$ , as follows:

$$\frac{d\theta}{dt} = \text{sign}(d\theta) \times \min([\exp(1.4 \times |d\theta|^{1.2}) - 1, \pi])$$

181 This gain was tuned to damp small values of  $d\theta/dt$ , stabilizing trajectories in the maze stem  
182 where mice typically made only small course corrections to maintain forward movement. The  
183 exponential dependence ensured that mice could still perform sharp turns (i.e. generate large  
184 values of  $d\theta/dt$ ) into the maze arms; see **Supplementary Methods** for more details.

185 Reward delivery was controlled by TTL pulses from the control PC sent to a solenoid valve  
186 (NResearch) and done through a beveled plastic 100- $\mu$ L pipette tip coupled to PVC plastic  
187 tubing (McMaster-Carr). Sounds were played through conventional computer speakers  
188 (Logitech). The apparatus was enclosed in a custom-designed cabinet (8020.inc) lined with  
189 sound-absorbing foam sheeting (McMaster-Carr). The whole system was controlled by a PC  
190 running the matlab-based software ViRMEn (Aronov and Tank, 2014) (available for download at  
191 <https://pni.princeton.edu/pni-software-tools/virmen-virtual-reality-matlab-engine>).

192 **Accumulating-towers task.** Mice were trained to run down a virtual T-maze (total length: 330  
193 cm, visual width: 10 cm, allowed travel width: 1 cm, wall height: 5 cm) and retrieve a fluid  
194 reward from one of the two end arms (each measuring 10.5  $\times$  11  $\times$  5 cm, length  $\times$  width  $\times$  height)  
195 (**Figure 1B**). As they ran down the central stem they saw briefly-appearing, tall, high-contrast  
196 objects (towers, width: 2 cm, height: 6 cm) on either side of the maze, and the arm on the side  
197 with the most towers contained the reward. Towers appeared whenever the animals were 10 cm  
198 away from them, and disappeared 200 ms later. In each trial, tower position within the cue period  
199 (200 cm) was drawn randomly from spatial Poisson processes with means of 7.7 towers/m for  
200 the rewarded side and 2.3 towers/m for the non-rewarded (minority cue) side (i.e. an overall  
201 tower density of 5  $\text{m}^{-1}$ ), and a refractory period of 12 cm; see **Supplementary Methods**.

202 At the start of each trial the mice were teleported to a 30-cm long starting location and the maze  
203 appeared. The virtual view angle was restricted to be 0 throughout this region, in essence acting  
204 as a buffer zone during which mice could straighten out their running patterns. After they ran  
205 past the starting location, the floor and wallpapers changed to indicate they were in the main part  
206 of the maze, and mice were then free to rotate the view angle. Towers could appear anywhere  
207 within the first 200 cm of the maze (cue period), and the last 100 cm of the maze (delay period)  
208 did not contain any towers but had the same wallpaper as the cue period. The wallpaper changed  
209 in the arms of the maze but was identical on both sides. After the mice reached one of the arms,  
210 the world was frozen for 1 s and then disappeared for 2 s (i.e. screen became black). A correct

211 response was thus followed by a 3-s inter-trial interval and was rewarded with a drop of 10%  
212 (v/v) sweet condensed milk solution (4 – 8  $\mu$ L), whereas an error was followed by a sound and  
213 an additional 9-s timeout period (total inter-trial interval of 12 s). Trials timed out after 600 sec  
214 (or 60 sec in some sessions).

215 Every session started with warm-up trials of a visually-guided maze. In this maze, towers  
216 appeared exclusively on one side, and a tall visual guide (30 cm) positioned in one of the arms  
217 indicated the reward location. In order to advance to the main maze, the mice were required to  
218 perform at least 10 warm-up trials at a minimum of 85% correct, with a maximum side bias  
219 (difference in percent correct between right- and left-rewarded trials) of 10% and at least 75% of  
220 good-quality trials, defined as trials in which the total distance traveled is at most 110% of the  
221 maze length. Once in the main maze, performance was constantly evaluated over a 40-trial  
222 running window, with two purposes. First, if performance fell below 55% correct, animals were  
223 automatically transferred to a block of trials in an easier maze, with towers shown only on the  
224 rewarded side, but with no visual guide. This block had a fixed length of 10 trials, after which  
225 the mouse returned to the main maze regardless of performance. The other purpose of the 40-trial  
226 window was to assess and attempt to correct side bias. This was achieved by changing the  
227 underlying probability of drawing a left or a right trial according to a balanced method described  
228 in detail elsewhere (Hu et al., 2009). In brief, the probability of drawing a right trial,  $p_R$ , is given  
229 by

$$p_R = \frac{\sqrt{e_R}}{(\sqrt{e_R} + \sqrt{e_L})}$$

230 Where  $e_R$  ( $e_L$ ) is the weighted average of the fraction of errors the mouse has made in the past 40  
231 right (left) trials. The weighting for this average is given by a half-Gaussian with  $\sigma = 20$  trials in  
232 the past, which ensures that most recent trials have larger weight on the debiasing algorithm. To  
233 discourage the generation of sequences of all-right (or all-left) trials, we capped  $\sqrt{e_R}$  and  $\sqrt{e_L}$  to be  
234 within the range [0.15,0.85]. In addition, a pseudo-random drawing prescription was applied to  
235 ensure that the empirical fraction of right trials as calculated using a  $\sigma = 60$  trials half-Gaussian  
236 weighting window is as close to  $p_R$  as possible, i.e. more so than obtained by a purely random  
237 strategy. Specifically, if this empirical fraction is above  $p_R$ , right trials are drawn with  
238 probability  $0.5 p_R$ , whereas if this fraction is below  $p_R$ , right trials are drawn with probability  
239  $0.5 (1 + p_R)$ .

240 The six DAT-IRES-Cre mice included in the dataset ran a slightly different version of the task.  
241 For these animals, the cue region was 220 cm and the delay was 80-cm long (vs. 200 and 100),  
242 the tower density was  $3.5 \text{ m}^{-1}$  (vs. 5), and the tower refractory period was 14 cm (vs. 12). For this  
243 reason, these mice were not included in any of the analyses except the comparison of  
244 performance between different strains (**Supplementary Figure 4**).

245 **Shaping.** Details about the shaping procedure can be found in **Supplementary Figure 1** and  
246 **Supplementary Table 1**. Briefly, mice underwent at least 11 shaping stages (T1 – T11, where  
247 T11 is the final maze explained in the previous paragraph). The first 4 stages (T1 – T4),  
248 consisted of visually-guided mazes with cues throughout the stem, and with progressively  
249 increasing lengths. Moreover, while the appearance of towers was triggered by proximity as

250 previously explained, they did not disappear after 200 ms. Final length was reached at maze T4.  
251 Next, the visual guide was removed (T5) and the cue period length was progressively decreased  
252 to its final value of 200 cm (T6 – T7). Up to T7, towers always appeared only on the rewarded  
253 side. The next step in shaping was to progressively increase the rate of minority cues (i.e. towers  
254 on the non-rewarded side, T8 – T11) and finally to make the towers disappear after 200 ms (T10  
255 – T11). An earlier version of the shaping procedure had 14 instead of 11 steps, whose only  
256 difference was to introduce changes more gradually, but eventually reaching an identical maze.  
257 These animals were included in all the analyses except that in **Supplementary Figure 1**. Mice  
258 were trained 5 – 7 days / week, for one 1-hour session per day. The only exceptions to this were  
259 for the first two days of training, where mice were acclimated to the VR setup for 30 and 45  
260 minutes, respectively. Mice typically took 6 – 7 weeks to reach the final stage (see **Results**).

## 261 **Data Analysis**

262 **Data selection.** The initial dataset was comprised of 1,067 behavioral sessions from 38 mice,  
263 with a total of 194,766 trials from the final accumulation maze ( $182.5 \pm 2.2$  trials/session, mean  
264  $\pm$  SEM). Besides regular behavioral training, we also included sessions occurring during either  
265 two-photon or widefield  $\text{Ca}^{2+}$  imaging, or optogenetic manipulation experiments. In the latter  
266 case, we only included control (laser off) trials (70 – 85% of trials in a session). Unless otherwise  
267 stated, we applied the following block-wise data inclusion criteria: 1) whole trial blocks (i.e.  
268 consecutive trials in the same maze, of which there could be multiple in a session) with an  
269 overall performance of at least 60% correct, including trials of all difficulties; 2) trials with a  
270 maximal traveled distance of 110% of nominal maze length (Harvey et al., 2012); 3) no  
271 timed-out or manually aborted trials; and 4) after applying criteria 1 – 3, individual mice with at  
272 least 1,000 trials. We thus selected 135,824 trials from 878 sessions and 25 mice (mean  $\pm$  SEM:  
273  $5,433 \pm 774$  trials/mouse, range: 1,118 – 15,283; mean  $\pm$  SEM:  $35.1 \pm 4.5$  sessions/mouse, range:  
274 7 – 86). For analyses involving effects of trial history (**Figures 7A–F**), we excluded all  
275 optogenetic sessions to avoid the use of non-consecutive trials, as well as those without at least 5  
276 trials of history (i.e. first five trials of a block). Those additional criteria yielded 66,411 trials  
277 from 18 mice and 507 sessions. For all model fits except the SDT model (**Figures 4, 6, 7, –7,**  
278 **Supplementary Figures 5, 6**), we required one trial of history, to allow for fair comparison  
279 between models with and without trial history. Those criteria yielded 81,705 trials from 20 mice  
280 and 597 sessions.

281 **Psychometric curves.** We built psychometric curves by plotting the percentage of trials in which  
282 the mouse chose the right arm as a function of the difference in the number of right and left  
283 towers ( $\#R - \#L$ , or  $\Delta$ ). For **Figure 2A** and **Supplementary Figure 6C, D**,  $\Delta$  was binned in  
284 groups of 3 and its value defined as the average  $\Delta$  weighted by the number of trials. We fitted the  
285 psychometric curves using a 4-parameter sigmoid:

$$p_R = b + \frac{a}{1 + \exp(-(\Delta - \Delta_0)/\lambda)}$$



286 The slope of this sigmoid (**Figure 2C**) was defined as  $a/4\lambda$  (the derivative of the curve at  $\Delta_0$ ),  
287 and lapse rate (**Figure 2D**) was defined as the average error rate (%) in all trials with  $|\Delta| \geq 10$ .

288 **Logistic regression analysis.** To assess how evenly mice weighted sensory evidence from  
289 different segments of the cue period (**Figures 3A, B**), we performed a logistic regression analysis  
290 in which the probability of a right choice was predicted from a logistic function of the weighted  
291 sum of the net amount of sensory evidence per segment,  $\Delta(y)$ , where  $y$  is one of 5 equally spaced  
292 segments between 10 and 200 cm (because tower appearance was triggered by proximity, the  
293 earliest possible tower occurred at  $y = 10$  cm):

$$p_R = \frac{1}{1 + \exp(-(\beta_0 + \sum_{i=1}^5 \beta_i \Delta_i))}$$

294 Note that this analysis is similar to the commonly used reverse correlation (e.g., (Brunton et al.,  
295 2013)). We have confirmed that both analyses yield very similar results (not shown). To estimate  
296 the amount of recency or primacy effects from the logistic regression coefficients (**Figure 3C**)  
297 we computed a weight decay ratio as  $[(\Delta_4 + \Delta_5)/2] / [(\Delta_1 + \Delta_2)/2]$ , such that values smaller than 1  
298 indicate primacy effects (i.e. initial portions of the cue period are weighted more towards the  
299 decision) and 1 indicates spatially homogeneous accumulation. To calculate the significance of  
300 the decay ratio for each mouse, spatial bin identities for each trial were shuffled 200 times, and in  
301 each iteration the logistic regression model was refit, yielding a null distribution for the ratio.  
302  $P$ -values were calculated as the proportion of shuffling iterations whose decay ratio was smaller  
303 than the actual ratio. Errors on logistic regression coefficient estimates for individual mice were  
304 calculated as the standard deviation of the distribution given by sampling the trials with  
305 replacement and refitting the model 200 times.

306 **Effect of number of towers, cue and delay duration.** For this analysis,  $|\Delta|$  and total number of  
307 towers were binned into groups of two, and effective duration of cue and delay periods into  
308 10-cm bins. Effective cue period duration was defined as the difference in the position of the last  
309 and first tower, regardless of side, and effective delay duration was defined as 300 (stem length  
310 in cm) minus the position of the last tower. We first calculated performance (% correct)  
311 separately for each binned value of  $|\Delta|$ , as a function of either cue duration (**Figure 5A**), total  
312 number of towers (**Figure 5B**) or delay duration (**Figure 5D**). To better estimate the relative  
313 contributions of  $|\Delta|$ , total number of towers and period duration (**Figure 5C**), we fit a linear  
314 model to the data as follows. First, for each mouse, we calculated performance for all 3-way  
315 combinations of binned predictor values (where period duration is of either cue or delay), and  
316 subtracted the average performance for that mouse. We then averaged these mean-subtracted  
317 performance values across mice, and fit a 3-parameter linear regression. Fitted parameter  
318 significance values were derived from the  $t$ -statistic of the parameter, i.e. its average divided by  
319 its standard deviation, which follows a  $t$  distribution with  $n - p - 1$  degrees of freedom, where  $n$   
320 is the number of data points and  $p$  is the number of parameters (Chatterjee and Hadi, 2015).

321 **Trial history analysis.** Alternation bias for each mouse (**Figures 67C–E**) was calculated as the  
322 percentage of trials in which they chose the arm opposite to their previous choice, subtracting the  
323 overall average percentage. In other words, we calculated the average difference between red and  
324 black, and blue and black curves in **Figures 7A, B**, with appropriate sign conventions. Note that  
325 positive alternation bias values indicate visiting the opposite arm in the following trial, whereas  
326 negative values indicate perseveration, i.e. visiting the same arm. For the analyses going five  
327 trials back (**Figures 7D, E**), bias is always defined with respect to trial zero ( $t_0$ ).

328 **Analysis of running speed.** Speed in cm/s was calculated on a trial-by-trial basis using the total  
329 x-y displacement for  $0 < y < 300$  cm (i.e. for the central stem). For the analysis in  
330 **Supplementary Figure 7C**, for each mouse, within-session standard deviation is the standard  
331 deviation across trials in the same session, averaged across sessions, and across-session standard  
332 deviation is the standard deviation of the distribution of average speeds for each session.

333 **View angle analysis.** In a given trial, the mouse traverses the T-maze with a y position trajectory  
334  $y(t)$  that is not necessarily monotonically increasing, as variations in motor control can cause  
335 small amounts of backtracking. We therefore defined the view angle at a particular Y position,  
336  $\theta(Y)$ , as the value of  $\theta$  at the first time  $t$  at which  $y(t) \geq Y$ . For the choice decoding analysis in  
337 **Figure 8B**, we defined an optimal choice decoding boundary  $\theta_{cd}(y)$  for a given y position by  
338 requiring that the fraction of right-choice trials with  $\theta(y) > \theta_{cd}(y)$  be equal to the fraction of  
339 left-choice trials with  $\theta(y) < \theta_{cd}(y)$ . Thus,  $\theta_{cd}(y)$  is the boundary that most equally separates the  
340 right- vs. left-choice distributions. The choice decoding accuracy was defined as the percent of  
341 right-choice trials with  $\theta(y) > \theta_{cd}(y)$ . For the analysis in **Figure 8D**, for each mouse we  
342 subtracted single-trial view angle trajectories from their average trajectory, separately for left and  
343 right choice trials. We then calculated tower-triggered trajectories separately for right and left  
344 towers, where  $y = 0$  was defined as the position of the mouse when the tower appeared.

345 **Brunton et al model.** For the analyses in **Figures 6A–C** and **Supplementary Figure 5**, we fit  
346 the model described in detail in (Brunton et al., 2013)). It is part of the family of the widely used  
347 drift diffusion models (DDMs) (Gold and Shadlen, 2007; Ratcliff and Rouder, 1998), and models  
348 a latent decision variable  $a$ , whose amount of change per maze y position is given by

$$da/dy = \begin{cases} 0 & \text{if } a \geq B \\ \sigma_a dW/dy + (\delta_{y,y_R} \eta_R C(\phi, \tau_\phi) - \delta_{y,y_L} \eta_L C(\phi, \tau_\phi)) \lambda a & \text{otherwise} \end{cases}$$

349 where  $\delta_{y,y_R}$  and  $\delta_{y,y_L}$  are delta functions at the spatial positions of right and left tower onset,  $\eta$  are  
350 i.i.d. variables drawn from  $N(1, \sigma_s^2)$ , the initial value of  $a$  is drawn from  $N(1, \sigma_a^2)$ , and  $dW$  is a  
351 Wiener process.  $B$  parametrizes the height of a sticky bound,  $C$  is a function of two parameters,  
352  $\Phi$  and  $\tau_\phi$ , and describes the adaptation dynamics to the sensory pulses. The memory time  
353 constant is given by  $\tau = 1/\lambda$ . Finally, a bias parameter determines the position of the threshold  
354 above which a right choice is made and the lapse rate represents the probability of trials in which  
355 subjects will ignore the stimulus and choose randomly. Both these parameters are applied at the  
356 end of the trial when converting the continuous decision variable into a binary decision. The  
357 model was fit using a gradient descent algorithm to minimize the negative log likelihood cost  
358 function, using the interior-point algorithm from the Julia package Optim. Gradients were

359 computed through automatic differentiation with respect to model parameters for each trial.  
 360 Automatic differentiation makes it possible to efficiently compute complex derivatives with  
 361 machine precision, and greatly improves the optimizer's performance. We used the following  
 362 parameter value constraints to fit the models:  $-5 < \lambda < 5$ ,  $0 < \sigma_a^2 < 200$ ,  $0 < \sigma_s^2 < 200$ ,  $0 < \sigma_i^2 < 30$ ,  
 363  $5 < B < 25$ ,  $0 < \Phi < 1.2$ ,  $0.001 < \tau_\phi < 2$  (maximum length of the cue period),  $-5 < \text{bias} < 5$ ,  $0 <$   
 364  $\text{lapse} < 1$ .

365 **Signal detection theory (SDT) model.** We used the SDT model (**Figure 6D**) developed by (Scott  
 366 et al., 2015)), where details about the method can be found. Briefly, the probability of making a  
 367 correct choice ( $p_c$ ) in a given trial was modeled as the difference of two Gaussian distributions  
 368 given by unique tower counts on the sides with the larger and smaller number of towers,  $L$  and  $S$ ,  
 369 where the variance of the distributions were the free parameters  $\sigma_L^2$  and  $\sigma_S^2$ :

$$p_c = \int_0^\infty N(L - S, \sqrt{\sigma_L^2 + \sigma_S^2}) d(L - S)$$

370 where  $L$  and  $S$  are an integer number of towers between 0 and 15 (we excluded trials with 16 or  
 371 more towers on one side since there were very few of them). The model thus had 16 free  
 372 parameters, whose best fit values were the ones that maximized the likelihood of the mice's  
 373 choices using the Matlab function `fmincon`'s interior-point algorithm. To fit this model, we only  
 374 used the metamouse (aggregate) data, since individual mice had too few trials to obtain good fits.

375 In order to statistically distinguish between the linear variance and the scalar variability  
 376 hypotheses, we explicitly modeled  $\sigma$  as either a linear or a square root function of the number of  
 377 towers instead of fitting separate  $\sigma$  values. Specifically, we fit two separate two-parameter  
 378 models to the data, one where  $\sigma(n) = \beta_0 + \beta_1 n$  and another where  $\sigma^2(n) = \beta_0 + \beta_1 n$ , with  $\beta_0$  and  $\beta_1$   
 379 being free parameters and requiring  $\beta_0 \geq 0$  (similar to models b and d in Fig. 4 of Scott et al.,  
 380 2015). Statistical significance was calculated by bootstrapping the data 1000 times and defined  
 381 as the proportion of bootstrap experiments in which the linear variance model had better  
 382 goodness-of-fit than the scalar variability model (using the model information index, see below).  
 383 For the two-parameter models, we also fitted individual mouse data. Note that for all SDT  
 384 models, unlike the other models, we used the full dataset including non-contiguous trials ( $n = 25$   
 385 mice, 135,824 trials), in order to gain statistical power.

386 **Heuristic models with trial history.** We fitted logistic regression models (**Figures 7G, H** and  
 387 **Supplementary Figure 6**) where the probability of making a right choice,  $p_R$ , was a function of  
 388 both sensory evidence (with two different parameterizations, see below), and trial history, as  
 389 follows:

$$p_R = \ell_L + \frac{1 - \ell_L - \ell_R}{1 + \exp[-p_0 - (1 + \beta_e e)(\beta_0 + \vec{\beta}_\Delta^T \vec{\Delta})]} \quad (1)$$

391 In the equation above,  $p_0 \equiv -\ln(1/f_R - 1)$  where  $f_R$  is the fraction of right-choice trials in  
 392 the given dataset. This was introduced such that when all the free model parameters  $\vec{\beta} \rightarrow 0$ , then  
 393  $p_R \rightarrow f_R$ , i.e. the models considered here are a nested set w.r.t. the null hypothesis that the

394 mouse has a constant right-choice probability  $f_R$ , which facilitates model comparison.  $\ell_R$  ( $\ell_L$ )  
 395 are lapse rates and can be interpreted as the probability of the mouse making a right choice in  
 396 very easy right- (left-) rewarded trials, which can depend on both the mouse's previous choice  
 397 and the resulting outcome of the previous trial (**Figures 7A, B**). In other words, because of the  
 398 observed trial-history-dependent vertical shifts in the psychometric curves (**Figures 7A, B**,  
 399 **Supplementary Figures C, D**), history-dependent terms modulated the lapse rates and not the  
 400 evidence terms inside the logistic function. Because probabilities must be bounded such that  
 401  $0 \leq p_R \leq 1$ , we constrained both lapse rates to be in the range  $0 \leq \ell_{R/L} \leq 0.5$  by applying a  
 402 cosine transform to the otherwise linear model of dependence on history terms  $\vec{h}$ :

$$\ell_R = \frac{1}{2}[1 - \cos(\beta_0^R + \vec{\beta}_h^T \vec{h})]$$

$$\ell_L = \frac{1}{2}[1 - \cos(\beta_0^L - \vec{\beta}_h^T \vec{h})]$$

403 Here,  $\beta_0^R$  and  $\beta_0^L$  are history-independent lapse rates, and  $\vec{h} = (c_{-1}^\pm, o_{-1}^\pm, c_{-1}^\pm \times o_{-1}^\pm)$ , where the  
 404 previous-choice indicator function  $c_{-1}^\pm$  is defined to be +1 (-1) if the mouse chose right (left) in  
 405 the previous trial, and the previous-outcome indicator function  $o_{-1}^\pm$  is defined to be +1 (-1) if the  
 406 mouse was rewarded in the previous trial. Back to equation (1),  $\beta_e$  was introduced to account for  
 407 history effects that change the slope of the evidence dependence after errors (**Figure 7B**),  
 408 multiplying the “error” indicator function  $e$ , which is defined to be +1 if the mouse made a  
 409 wrong choice in the previous trial and -1 otherwise. Finally,  $\vec{\Delta}$  is a vector of evidence weights  
 410 that took two different forms. For the model in **Figure 7H**, this vector was equivalent to that in  
 411 the spatial bin logistic regression model described previously, i.e. the cue region was divided into  
 412 5 equal-width bins spanning  $y = 10 - 200$  cm, and  $\vec{\Delta}$  was set to be a 5-dimensional vector where  
 413 each coordinate corresponds to  $\#R - \#L$  towers in each of the bins. For the model in  
 414 **Supplementary Figure 6** (cue order model), we built the evidence vector as follows. For a given  
 415 trial, cues (including both sides) were first ranked by their  $y$  position in ascending order, i.e. rank  
 416 1 corresponds to the first cue seen by the mouse on that trial. To improve statistical power, this  
 417 rank was downsampled by a factor of 3 before defining  $\vec{\Delta}$  as a vector of  $\#R - \#L$  restricted to  
 418 cues with the corresponding ranks. That is, the first coordinate of  $\vec{\Delta}$  is  
 419  $\delta_{1-3} = [\#R - \#L]_{\text{ranks } 1-3}$ , the second coordinate is  $\delta_{4-6} = [\#R - \#L]_{\text{ranks } 4-6}$ , and so forth.  
 420 Because the total number of cues differs from trial to trial due to random sampling, this means  
 421 that not all trials have information for what would be the 2<sup>nd</sup> and onwards coordinates of  $\vec{\Delta}$ . In  
 422 order for the model to be well-posed, the dimensionality of  $\vec{\Delta}$  is fixed to be the maximum  
 423 possible such that there are at least 50 trials that have information for the last coordinate. Trials  
 424 with fewer than this number of cues are therefore assumed to have  $\Delta_i = 0$  for the remaining  
 425 coordinates. The evidence vector was then normalized as  $\vec{\Delta} = (\delta_{1-3}, \delta_{4-6}, \dots) / \langle |\Delta| \rangle_n^{1/2}$ . The  
 426 normalization factor  $\langle |\Delta| \rangle_n$  depends on the number of cues  $n$  for the given trial, and defined to  
 427 be the average  $|\#R - \#L|$  over all trials in the dataset with the same number  $n$  of cues. These  
 428 models were fit by maximizing the log-likelihood including L1 penalty terms for all free

429 parameters (Schmidt, 2010). For a more detailed treatment of the models and fitting procedure,  
430 refer to **Supplementary Methods**.

431 **Alternative strategy models. 1) Trial-history-only model (Figure 4A):** we fitted a logistic  
432 regression model in which choice was a function only of previous trial history. The model is the  
433 same as in equation (1), except it did not contain the spatially binned evidence terms  $\vec{\Delta}$ . **2) K**  
434 **random tower models:** for these models, we assume that in each trial the mouse chooses  $k$   
435 towers at random (from all presented towers) and uses only those to make its decision. The  
436 probability of making a right choice is thus equivalent to the probability that the majority of the  $k$   
437 towers is on the right side, i.e.  $k_R > k/2$ . This is given by the hypergeometric distribution, which  
438 gives us the probability of  $k/2$  in  $k$  random draws without replacement from a population of size  
439  $\#R + \#L$ , given that we know that  $\#R$  towers are on the right. We implemented this using the  
440 Matlab function `hygecdf`. Note that in the special case where  $k = 1$  (i.e. the one random tower  
441 model, **Figures 4B,C**), the probability of choosing right reduces to  $\#R/(\#R+\#L)$ . **3) First tower**  
442 **and Last tower models:** here we simply assume that the mouse will choose right if the first (last  
443 tower) appears on the right. In order to account for lapse rates in model classes **2)** and **3)**, the  
444 obtained probability of going right,  $p_R^m$ , was modulated by the experimentally measured lapse  
445 rates for right and left trials ( $l_R$  and  $l_L$ ) for each animal, i.e.  $p_R = l_R + [(1 - (l_R + l_L))]p_R^m$ .  
446 These lapse rates can be assessed independently of  $p_R^m$  by using trials where there are only  
447 towers on one side, for which  $p_R^m = 1$  for all these models. Therefore,  $l_R$  ( $l_L$ ) is the fraction of  
448 error trials out of all trials with only left (right) towers. For further details on alternative strategy  
449 models, refer to **Supplementary Methods**.

450 **Model comparison and cross-validation.** All models except the SDT were evaluated separately  
451 for each mouse using 70 runs of 3-fold cross-validation (i.e. using  $2/3$  of the data for training and  
452  $1/3$  for testing the model), making sure that the subsamples of data used in each run were identical  
453 for all models. In these models, we are either hypothesizing that trial history effects do not exist,  
454 or that trial history effects have particular explicit parameterizations as described above.  
455 Therefore the model prediction for each trial is uncorrelated with that of any other trial (beyond  
456 any explicitly modeled history effects), and for each run we calculated the log likelihood ( $\ln L$ )  
457 of the test dataset given the best-fit parameters on the training set, as follows. Let the mouse's  
458 choice on the  $i^{\text{th}}$  trial be  $c_i, i = 1, \dots, m$  which is 1 (0) if the mouse chose right (left). The  
459 likelihood of observing this choice is given by the binomial distribution  
460  $B(1, p_R) = p_R(\vec{x}_i)^{c_i} [1 - p_R(\vec{x}_i)]^{1-c_i}$ , where  $\vec{x}_i$  are various features of the  $i^{\text{th}}$  trial that the model  
461 depends on (evidence, trial history, and so forth). Taking the product of individual-trial  
462 likelihoods we obtain:

$$\ln L_x = \sum_{1 \leq i \leq m} \{c_i p_R(\vec{x}_i) \ln p_R(\vec{x}_i) + (1 - c_i) \ln[1 - p_R(\vec{x}_i)]\}$$

463 Additionally, we calculated a reference log likelihood ( $\ln L_0$ ) of a trivial model with constant  
464 probability of going right,  $f_R$ , being the experimentally-measured fraction of trials in which the  
465 animal went right. We then defined the goodness-of-fit of a given model to be the model  
466 information index,  $MI$ :

$$MI = \frac{(\ln L - \ln L_0)/n_{\text{trials}}}{\ln(2)}$$

467 In other words, we calculated a trial-averaged excess likelihood of the model (compared to the  
468 trivial model) and converted the log to base 2, which gives us the amount of information of the  
469 model in units of bits/trial (Paninski et al., 2004; Pillow et al., 2008). In the cross-validation  
470 framework, all model parameters are extracted using the training set of 2/3rds of trials, and the  
471 *MI* values are evaluated only using the test set of 1/3rd of trials, which penalizes overfitting. To  
472 compare models across the population, we took the median *MI* across the 210 cross-validation  
473 runs for each mouse. To assess significance of the difference between *MI*s for a given mouse, we  
474 calculated a *P* value as the proportion of runs in which one model out(under)-performed the  
475 other.

476 **General statistics.** Datasets were tested for normality using the Lilliefors' modification of the  
477 Kolmogorov-Smirnov test. For comparisons between two normally distributed datasets, we used  
478 two-sided t-tests, and for non-normally distributed datasets we used the Wilcoxon sign rank test  
479 (or their paired test counterparts where appropriate). Multiple comparisons were corrected using  
480 the false discovery rate correction method described in (Benjamini and Hochberg, 1995) (see  
481 also (Guo et al., 2014)). Briefly, *P* values are ranked in ascending order, and the *i*th ranked  
482 *P*-value,  $P_i$ , is deemed significant if it satisfies  $P_i \leq (\alpha i)/n$ , where *n* is the number of comparisons  
483 and  $\alpha = 0.05$  in our case. For tests involving the comparisons among multiple groups, we  
484 performed one- or two-way ANOVAs with repeated measures, followed by Tukey's post-hoc  
485 tests where appropriate. Binomial confidence intervals were calculated as 1- $\sigma$  intervals using  
486 Jeffrey's method.

## 487 RESULTS

### 488 Accumulating-towers task

489 We have developed a novel pulse-based evidence accumulation task for mice navigating in  
490 virtual reality (VR) (**Figure 1, Supplementary Movie 1**). Briefly, mice were trained to navigate  
491 on a virtual T-maze to retrieve water rewards from one of the two arms. While they ran down the  
492 central part of the maze (cue region, 200 cm), salient visual cues (towers) appeared transiently  
493 (200 ms) on either side. After a delay period without any cues (100 cm), the animal made either a  
494 right or left turn into one of the arms, and was rewarded if this corresponded to the side that had  
495 the highest number of towers (**Figure 1B**). Incorrect choices led to the playing of an  
496 error-indicating sound and a time-out period of 9s, in addition to the regular 3-s intertrial  
497 interval. The cues were distributed as spatial Poisson processes (**Supplementary Methods**) with  
498 different rates on the rewarded and unrewarded sides, such that the positions and number of  
499 towers on either side varied from trial to trial. This, together with the transient nature of the cues,  
500 meant that towers needed to be incrementally accumulated towards a decision. Importantly, the  
501 precisely controlled stimulus times allowed for powerful computational approaches when  
502 analyzing the data.

503 We developed detailed shaping procedures whereby different elements of the final task were  
504 gradually introduced, with well-defined and automated criteria for progression through the  
505 various stages (**Supplementary Figure 1, Supplementary Table 1**). Most animals in the dataset  
506 underwent an 11-step procedure, taking  $34.8 \pm 4.5$  daily sessions (mean  $\pm$  SEM,  $n = 17$  mice) to  
507 reach the final stage, or 6 – 7 weeks including training breaks.

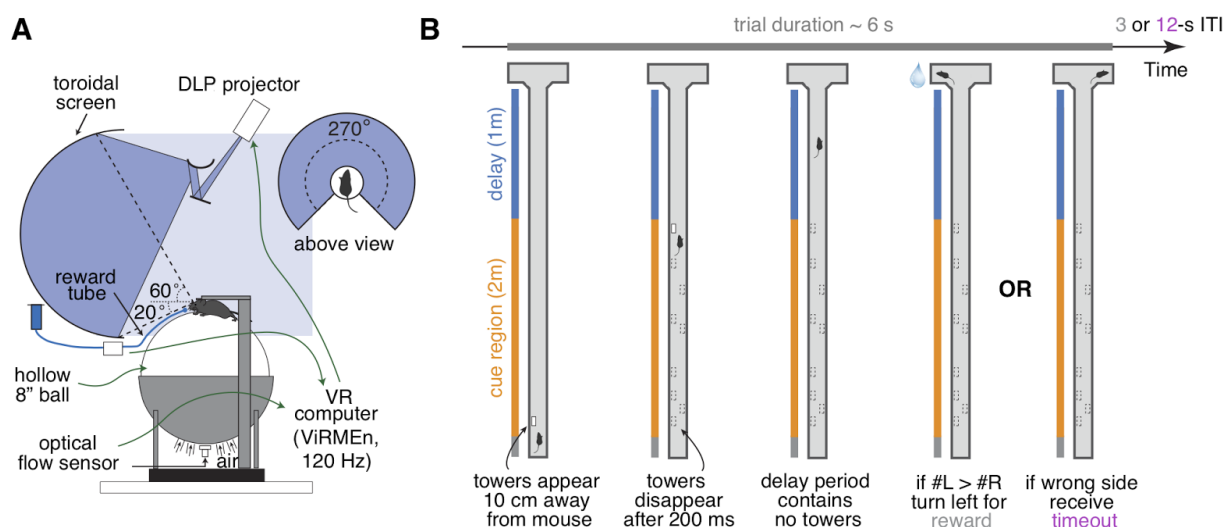

508 **Figure 1 | Accumulating-towers task. (A)** Schematic drawing of the VR setup used to train  
509 mice in the task. **(B)** Schematic drawing of the task showing the progression of an example  
510 left-rewarded trial.

### 511 Mice are sensitive to the amount of sensory evidence

512 We analyzed data from 25 mice with at least 1,000 trials on the final accumulation maze,  
513 obtaining a total of 135,824 trials (see **Materials and Methods** for details on data selection).  
514 Overall task performance including all trial difficulties was  $68.7 \pm 0.5$  % correct (mean  $\pm$  SEM,  $n$   
515  $= 25$ , range: 64.7 – 72.8 %). We were able to obtain many good-performance sessions for most  
516 mice (**Supplementary Figure 2**), including very high-performance sessions with steep  
517 psychometric curves and low lapse rates (e.g. **Figure 2A**). Performance was variable across  
518 sessions (standard deviation of overall performance across sessions:  $7.0 \pm 0.4$  %, mean  $\pm$  SEM  
519 across mice), and could fluctuate within sessions (**Supplementary Figure 2C** and  
520 **Supplementary Figure 3**), typically dropping towards the end, presumably when the mice were  
521 sated (**Supplementary Figure 3A**).

522 Importantly, performance was modulated by the amount of sensory evidence ( $\#R - \#L$  towers, or  
523  $\Delta$ ), as revealed by psychometric curves (**Figures 2A, B, Supplementary Figure 3B**). Taking all  
524 blocks of consecutive trials in the same maze level into account (a block is defined here as  
525 consecutive trials in the same maze level, and there could be multiple within a session, see

526 **Materials and Methods**), the slope of the psychometric function was  $4.7 \pm 0.2$  %/tower (mean  $\pm$   
 527 SEM, **Figure 2C**), and the lapse rate, defined as the error rate for  $|\Delta| \geq 10$ , was  $21.4 \pm 0.9$  %  
 528 (**Figure 2D**).

529 Given the variability we observed in performance, we next explored different performance  
 530 selection criteria. For instance, if only the blocks over the 90th percentile of overall performance  
 531 were selected, psychometric slope and lapse rate were  $8.2 \pm 0.4$  %/tower and  $12.8 \pm 1.1$  %,  
 532 respectively (**Figures 2C, D**, green histograms). Of course, if we assume that different  
 533 behavioral blocks are noisy samples from static psychometric curves, applying these criteria  
 534 would trivially yield better performance indicators. To explicitly test for this possibility, we  
 535 assumed that each mouse had a static psychometric curve across all sessions and generated 200  
 536 surrogate datasets by drawing samples from the binomial distributions given by the psychometric  
 537 curves at the actual experienced values of  $\Delta$  towers, and reselected the top 10% of blocks for  
 538 each of these 200 draws. Interestingly, only the average improvements in lapse rate, but not  
 539 psychometric slope, were significantly smaller in the surrogate data than the actual observed  
 540 improvement (**Figures 2 E, F**,  $P = 2.4 \times 10^{-4}$  and 0.97 respectively for lapse and slope, one-sided  
 541 signed rank test; 7/18 mice have individually significant differences for lapse). This can be  
 542 understood by noting that trials with  $|\Delta|$  towers  $\geq 10$  comprise only  $\sim 10\%$  of the total number,  
 543 making them a relatively unimportant contribution to the overall performance and therefore not  
 544 much affected by selection in the simulated static-psychometric data. We thus conclude that  
 545 actual mice exhibit significantly lower lapse rates on high-performance behavioral blocks, but  
 546 not more sensitivity to evidence, beyond that expected by random sampling.

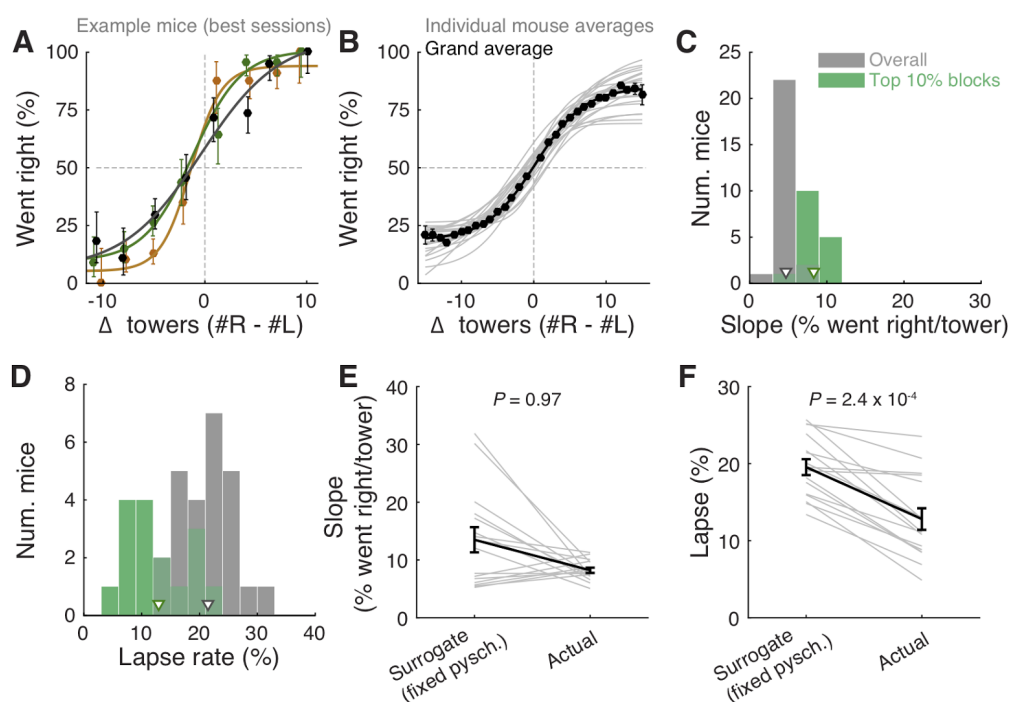

547 **Figure 2 | Performance of the accumulating-towers task.** (A) Best-session example  
 548 psychometric functions from three mice. Circles: data points, lines: sigmoidal function fits, error  
 549 bars: binomial confidence intervals. (B) Overall psychometric functions across the population.



550 Thin gray lines: sigmoidal function fits for all mice with at least 1000 trials ( $n = 25$ ). Black  
551 circles and line: psychometric function with sigmoidal fit for aggregate data (metamouse,  $n =$   
552 135,824 trials). Error bars: binomial confidence intervals. **(C)** Distribution of slope of the  
553 psychometric function for the individual mice shown in B, pooling all data (gray) or selecting the  
554 top 10% of blocks for each animal (with at least 300 remaining trials after this selection,  $n = 16$ ),  
555 as defined by average performance. Arrowheads: mean. **(D)** Distribution of lapse rates for the  
556 mice shown in B, defined as the average error rate for trials where  $|\#R - \#L| \geq 10$ . Conventions  
557 as in C. **(E)** Comparison between psychometric slopes obtained for the top 10% of blocks in a  
558 surrogate dataset sampled from a fixed psychometric curve vs. the actual data. Thin gray lines:  
559 individual mice, black lines: average, error bars:  $\pm$  SEM. **(F)** Comparison of lapse rates between  
560 the surrogate and actual data sets. Conventions as in E.

561 We also wondered what impact within-session fluctuations in performance had in the measured  
562 psychometric functions. We calculated ongoing performance using a sliding gaussian window  
563 and recalculated psychometric functions after excluding low-performance bouts (i.e. consecutive  
564 trials with performance below several different thresholds). Excluding these trial bouts yielded  
565 sharper psychometric curves with lower lapse rates (**Supplementary Figure 3B**). While these  
566 criteria were not used for any other analyses in this work, they illustrate how more stringent trial  
567 selection criteria may be applied depending on data analysis needs.

568 Behavioral performance in the accumulating-towers task was thus on average comparable to that  
569 seen in rats doing an analogous task (Scott et al., 2015), consistent with the finding that mice and  
570 rats perform similarly in several perceptual decision-making tasks (Jaramillo and Zador, 2014;  
571 Mayrhofer et al., 2013). Additionally, mice of different strains did not show any statistically  
572 significant differences in a variety of performance indicators, except for running speed  
573 (**Supplementary Figure 4**). Note, however, that strain comparison was not the main goal of this  
574 study, and sample sizes and the specific chosen strains were a function of data available from  
575 separate unpublished, ongoing studies. We thus lacked the appropriate sample size to detect  
576 small differences in behavior. This caveat notwithstanding, we were able to train mice from all  
577 tested strains on the task.

## 578 **Mice use multiple evidence pulses from the entire cue region**

579 We next sought to determine whether mice solve the task by using towers from the entire cue  
580 period. For each mouse we performed a logistic regression analysis to predict choice using the  
581 amount of net evidence in each of 5 equally spaced bins spanning the 200-cm cue region. We  
582 observed a variety of shapes in the curves given by the different spatial weights in the model  
583 (**Figures 3A, B**): while some mice had fairly flat curves, suggesting spatially homogeneous  
584 accumulation of evidence (**Figure 3A**), others had curves with higher coefficients in the  
585 beginning of the maze, indicating primacy effects, and a minority had higher coefficients in the  
586 later spatial bins, suggesting recency effects (**Figure 3B**). To better quantify this, we computed a  
587 weight decay ratio between the average weight in the two last and two first bins, such that  
588 numbers smaller than one indicate primacy, and estimated statistical significance of individual

589 animals with a shuffling procedure (**Figure 3C**, see **Materials and Methods**). Across the  
 590 population, we obtained an average ratio of  $0.73 \pm 0.06$  (mean  $\pm$  SEM), significantly different  
 591 than one ( $P = 1.3 \times 10^{-4}$ , two-sided t-test). Furthermore, 10/25 mice had indices that were  
 592 significantly smaller than one. Next, to further quantify the contribution of towers from different  
 593 portions of the cue period, we calculated the percentage of trials containing cues on the  
 594 non-rewarded side (minority cues) in the different spatial bins, separately for correct and error  
 595 trials (**Figures 3D, E**). The overall magnitude of this percentage was significantly different  
 596 between correct and error trials ( $F_{1,24} = 381.75$ ,  $P = 5.73 \times 10^{-50}$ ), as expected because trials with  
 597 a higher density of minority cues are more difficult by design. Unlike what was observed in a  
 598 different evidence-based navigation task (Morcos and Harvey, 2016), the distribution of trials  
 599 with minority cues did not vary significantly as a function of position ( $F_{1,4} = 0.15$ ,  $P = 0.96$ ,  
 600 2-way repeated-measures ANOVA). On the whole, these analyses suggest that the mice take into  
 601 account evidence from the entire cue period, on average slightly overweighting earlier evidence.  
 602 This is consistent with findings from both humans and monkeys performing pulse-based  
 603 evidence accumulation tasks (Bronfman et al., 2016; Kiani et al., 2008; Tsetsos et al., 2012).

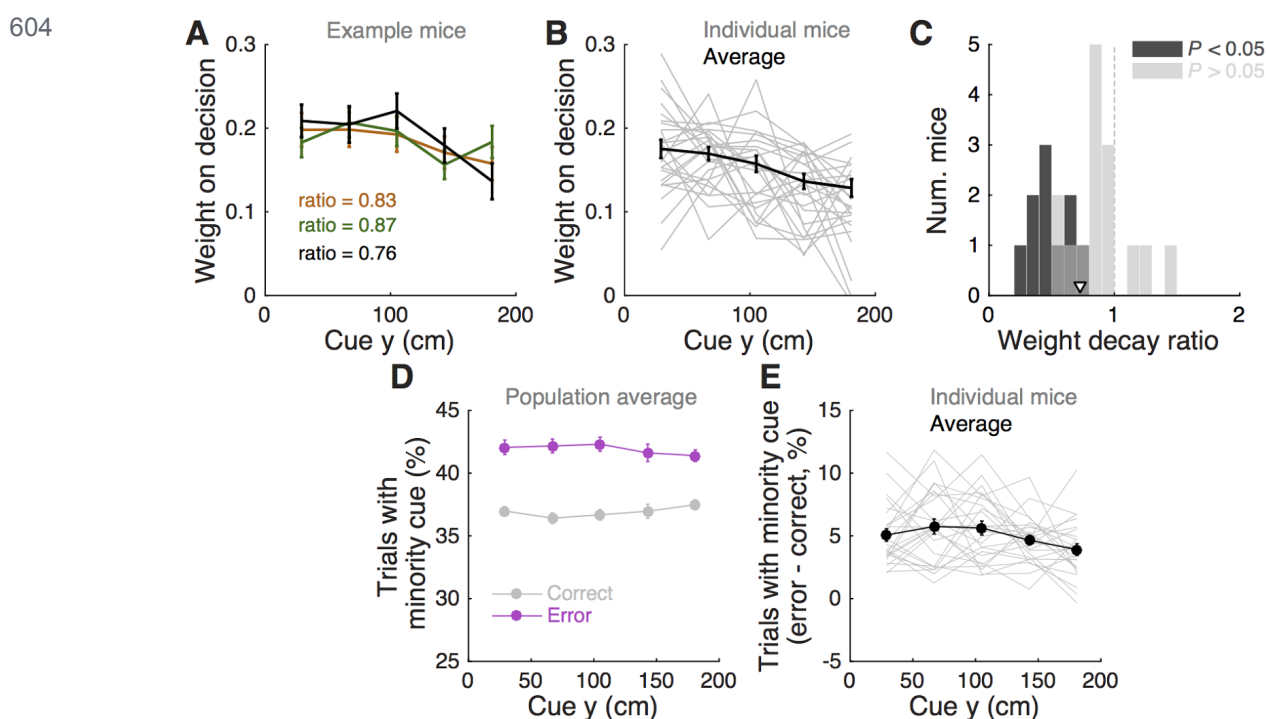

605 **Figure 3 | Mice use cues from the entire cue region. (A)** Example logistic regression for three  
 606 mice. In this analysis, net evidence ( $\#R - \#L$ ) in each of five spatial bins is used to predict the  
 607 mouse's final decision to turn left or right. Notice fairly flat shapes, suggesting that mice take  
 608 into account evidence from all parts of the cue period. **(B)** Logistic regression coefficients for all  
 609 mice with at least 1000 trials (thin gray lines,  $n = 25$ ), along with average coefficients across the  
 610 population (thick black line). Error bars,  $\pm$  SEM. **(C)** Distribution of weight decay ratios for the  
 611 mice shown in B, defined as the average of coefficients in the last two bins divided by the  
 612 average of the coefficients in the first two bins. Dark gray: mice with significantly non-flat

613 logistic regression weight curves ( $P < 0.05$ ), light gray: mice with flat curves ( $P \geq 0.05$ ).  
614 Arrowhead: mean. **(D)** Average percentage of trials containing at least one minority cue in each  
615 binned cue region position for correct (black) and error trials (magenta). Error bars,  $\pm$  SEM. **(E)**  
616 Difference between the percentage of trials containing at least one minority cue in each binned  
617 cue region position between correct and error trials, shown for each individual mouse (thin gray  
618 lines), and the average across mice (thick black line). Error bars,  $\pm$  SEM

619 In theory, it is possible that some of the aforescribed findings could be obtained if the mice  
620 were selecting (one) random tower(s) in different trials, or, less likely, employing more  
621 degenerate strategies that do not rely on sensory evidence at all. To test for these possibilities, we  
622 built models that implemented such strategies and compared them against models containing  
623 spatially binned evidence terms (**Figure 4**). First, we built a trial-history-only model that only  
624 contains previous choice and reward terms, i.e. no evidence is used for the decision (see  
625 **Materials and Methods**). This modeled the population of mice more poorly, in terms of having  
626 significantly worse cross-validated goodness-of-fit (model information index,  $MI$ ) compared to a  
627 model that also has sensory evidence terms ( $P = 8.9 \times 10^{-5}$ ,  $n = 20$ , signed rank test, **Figure 4A**).  
628 We next assessed a model in which the mouse uses exactly one randomly selected tower per trial  
629 to make a decision. Again, this model had significantly worse  $MI$  than a model where evidence  
630 is used for the decision ( $P = 4.1 \times 10^{-4}$ ,  $n = 20$ , paired t-test, **Figure 4A**; both models also have  
631 left/right lapse parameters). Moreover, we reasoned that, in this scenario, for a fixed number of  
632 total towers ( $\#R + \#L$ ) behavioral performance should vary linearly with  $\#R - \#L$  (Morcos and  
633 Harvey, 2016), whereas if the mouse uses multiple cues the psychometric curve should deviate  
634 from linearity. The data supported the latter: the experimentally obtained psychometric curve  
635 was significantly different than the line predicted by the one-random-tower hypothesis (**Figure**  
636 **4C**,  $P < 0.01$ , shuffling test, see **Supplementary Materials and Methods**). Additionally, we  
637 reasoned that the one-random-tower hypothesis predicted that, for trials without any minority  
638 cues (i.e. no towers on the non-rewarded side), performance should not vary as a function of the  
639 number of towers, since any randomly selected tower would lead to a correct decision. This,  
640 however, is not what we observed. When we compared trials with fewer than 5 towers to trials  
641 with more than 9 towers (all on the rewarded side), performance was significantly higher in the  
642 latter case for all mice with sufficient trials for this analysis ( $P < 0.001$ , signed rank test, not  
643 shown). Finally, we implemented other models in which the mice adopt other trivial strategies,  
644 namely making a choice based on the first tower, last tower, and 3, 5 or 7 random towers (see  
645 **Materials and Methods**). The spatial bin logistic regression model (**Figure 3**) significantly  
646 outperformed all five alternative models at the population level (data not shown,  $n = 20$ ,  $P <$   
647  $0.01$ , paired difference tests with false discovery rate correction, see **Materials and Methods**). .

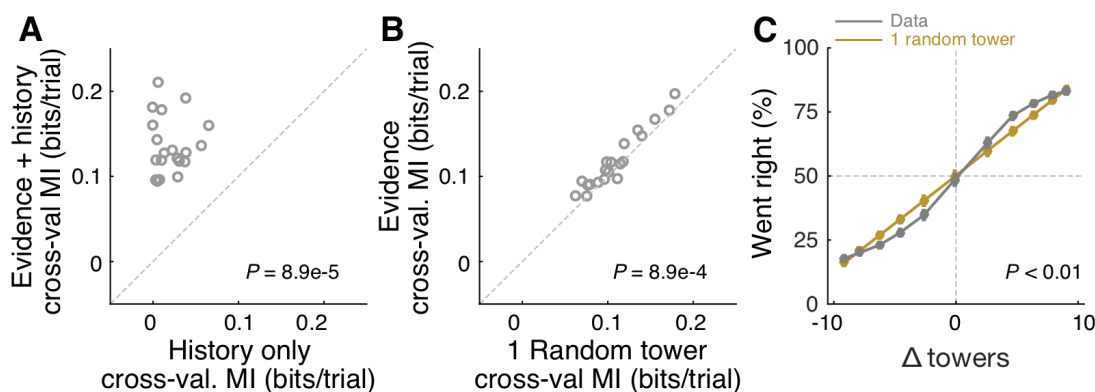

648 **Figure 4 | Mice rely on multiple cues to perform the task.** (A) Comparison of cross-validated  
649 prediction performance of a model containing both trial history and spatially binned evidence  
650 (Figure 7H) and one containing only trial history terms ( $n = 20$  mice). MI: model information.  
651 (B) Comparison of cross-validated prediction performance of a model in which the mouse makes  
652 a decision based on a single random tower and one with spatially binned evidence (no history) ( $n$   
653  $= 20$  mice). (C) Psychometric curves for the actual data and a model that chooses from each trial  
654 1 of the presented cues (randomly) and bases the trial choice on the identity of that cue. Data is  
655 aggregated across mice for trials where the total number of cues ( $\#R + \#L$ ) is equal to 12. In the  
656 scenario where  $\#R + \#L$  is fixed, we expect the “1 random cue” model’s performance to be linear  
657 with  $\#R - \#L$  (as is borne out in the figure). In contrast, if mice used multiple cues the  
658 psychometric curve should be different from a line. The psychometric curve for the actual data  
659 (blue) is significantly different from that predicted by the ‘1 random cue’ model ( $P < 0.001$ ,  
660 shuffle test, see **Supplementary Materials and Methods**).

#### 661 **Performance is affected by the number of cues but not trial duration**

662 Having thus established that mice accumulate multiple pulses of evidence from the whole cue  
663 period, we next sought to quantify in more detail how the number of towers and cue or delay  
664 period duration affected performance. For trials with similar difficulty (same  $|\Delta|$  towers), we  
665 plotted percent correct performance as a function of the effective duration of the cue and delay  
666 periods, and noticed no apparent dependence (Figures 5A, D). Conversely, when we plotted  
667 performance as a function of the total number of towers ( $\#R + \#L$ ) for different values of  $|\Delta|$ , we  
668 observed a consistent decrease in performance with increasing numbers of towers (Figure 5B),  
669 similar to previous findings in the rat (Scott et al., 2015). To quantify how  $|\Delta|$ ,  $\#R + \#L$  and  
670 duration each influence performance, we fitted a linear model using these three quantities as  
671 predictors (see **Materials and Methods** for details). The largest contribution to performance was  
672 given by  $|\Delta|$  ( $P = 3.1 \times 10^{-46}$ , t statistic for regression coefficients), and total number of towers  
673 had a significant negative coefficient ( $P = 2.4 \times 10^{-11}$ ), whereas the cue duration coefficient was  
674 not significantly different than zero ( $P = 0.64$ )(Figure 5C).

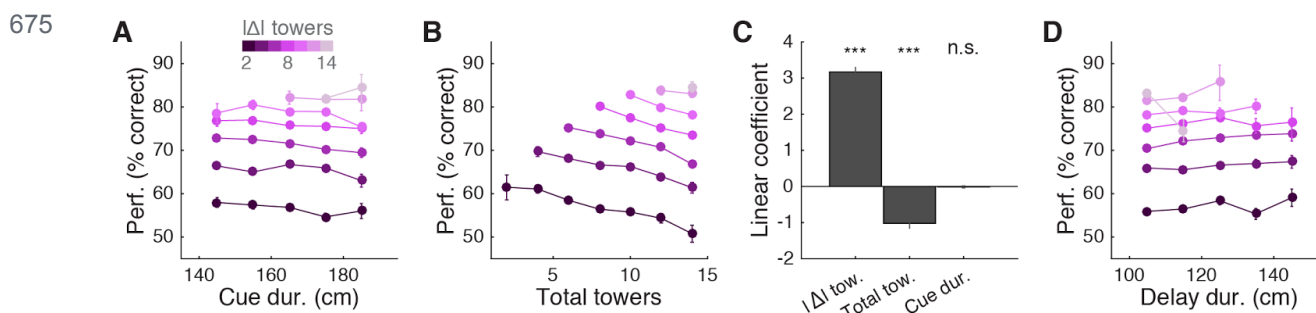

676 **Figure 5 | Behavioral performance decreases with increasing total number of towers, but**  
 677 **not duration of cue period. (A)** Overall performance as a function of effective cue period  
 678 duration in space, for various subsets of trials with different absolute differences between tower  
 679 counts ( $|\Delta|$ , color code). Effective duration is defined as the position of the last viewed tower  
 680 minus the position of the first tower. Error bars: binomial confidence intervals. **(B)** Overall  
 681 performance as a function of the total number of towers ( $\#R + \#L$ ), for subsets of trials with  
 682 different  $|\Delta|$ . Conventions as in (A). **(C)** Best-fit coefficients from a linear regression model  
 683 predicting performance as a weighted combination of  $|\Delta|$  towers, total towers, and effective cue  
 684 period duration. The data is the mean-subtracted performance averaged across mice. Error bars:  
 685 standard error for each parameter. Significance was calculated from parameter  $t$ -statistics. **(D)**  
 686 Overall performance as a function of effective delay period duration in space for subsets of trials  
 687 with different  $|\Delta|$ . Error bars: binomial confidence intervals. Conventions as in (A).

688 A potential explanation for the findings described above is the existence of one or more sources  
 689 of noise that grow proportionally with the number of visual pulses presented in the trial, and that  
 690 the noise generated by these sources is greater than stimuli-independent noise sources, such as  
 691 time-dependent accumulation (diffusion) noise in a drift-diffusion model (DDM) framework  
 692 (Brunton et al., 2013; Scott et al., 2015). Potential sources of stimulus-dependent noise are many,  
 693 and include noise in stimulus presentation and/or processing, which adds noise independently  
 694 with each pulse (Brunton et al., 2013; Smith and Ratcliff, 2004), or noise that scales non-linearly  
 695 with the total amount of pulses (Fechner, 1860; Scott et al., 2015).

696 To further investigate this, we fitted the data using two different models. First, to estimate the  
 697 magnitude of different noise sources, we employed a DDM developed by Brunton et al. (Brunton  
 698 et al., 2013), which models a latent decision variable as a function of memory leak ( $\lambda$ ), a sticky  
 699 accumulation bound, and three sources of noise: diffusion, stimulus and initial value of the  
 700 accumulator (in addition to four other parameters, see **Materials and Methods, Supplementary**  
 701 **Figure 5**). Consistent with findings in rats (Brunton et al., 2013; Scott et al., 2015), we found  
 702 that sensory noise was the dominant source of noise for the majority of mice (**Figures 6A,B** and  
 703 **Supplementary Figure 5**, across the population:  $P = 7.0 \times 10^{-4}$ ,  $t$  test, and  $5.9 \times 10^{-4}$ , signed rank  
 704 test, respectively for  $\sigma_s^2$  vs.  $\sigma_i^2$  and  $\sigma_s^2$  vs.  $\sigma_a^2$ ; 8/20 and 9/20 mice had significantly higher  $\sigma_s^2$ ,  
 705 compared to  $\sigma_i^2$  and  $\sigma_a^2$ , respectively, based on proportions of cross-validation runs). Also  
 706 consistent with the previous studies, we found memory leaks close to zero (**Figure 6C**) ( $\lambda = 0.03$   
 707  $\pm 0.09$   $m^{-1}$ , mean  $\pm$  SEM,  $P = 0.78$ , two-sided  $t$ -test vs. zero, only four animals had  $\lambda$  values that

708 were statistically different from zero). These results are also consistent with our analyses in  
 709 **Figure 5**, where neither the duration over which the cues are presented nor the effective delay  
 710 interval after the last cue are significant factors (beyond #R and #L). Like other DDMs, the  
 711 Brunton et al. model assumes that each pulse of evidence is associated with independent  
 712 Gaussian noise, which results in linear scaling of the total variance with increasing number of  
 713 pulses. This assumption, however, has been shown not to hold for an analogous visual pulse  
 714 accumulation task in the rat or the acoustic version of Brunton et al. (Scott et al., 2015). Instead,  
 715 the standard deviation of the perceived evidence (i.e., not the variance but its squared root)  
 716 increased linearly with increasing number of pulses, favoring a scalar variability framework  
 717 (Fechner, 1860; Gallistel and Gelman, 2000). We attempted to quantify this in our data by fitting  
 718 the same Signal Detection Theory (SDT) model as Scott et al. In this model, each unique tower  
 719 count is associated with a Gaussian distribution of mean number of towers  $\mu_T$  and standard  
 720 deviation  $\sigma_T$ , the latter being the free parameter. The probability of choosing a side is given by  
 721 the difference in the distributions of left and right tower counts (see **Materials and Methods** for  
 722 details). For the data aggregated across mice (we failed to obtain low-noise parameter estimates  
 723 from fits to individual mice), best-fit  $\sigma_T$  grew monotonically with the number of towers  $T$   
 724 (**Figure 6D**). We then fitted two competing two-parameter models to directly test whether scalar  
 725 variability or linear variance predicted the data better. Again in agreement with the visual and  
 726 auditory rat tasks (Scott et al., 2015), we found that the scalar variability was, on average, a  
 727 better model than the alternative, although the results were variable at the level of individual  
 728 mice (for aggregate data:  $P < 0.003$ , bootstrapping; 10/25 individual mice had significantly better  
 729 predictions from the scalar variability model, 2/25 had better linear variance, 13/25 were  
 730 statistically indistinguishable).

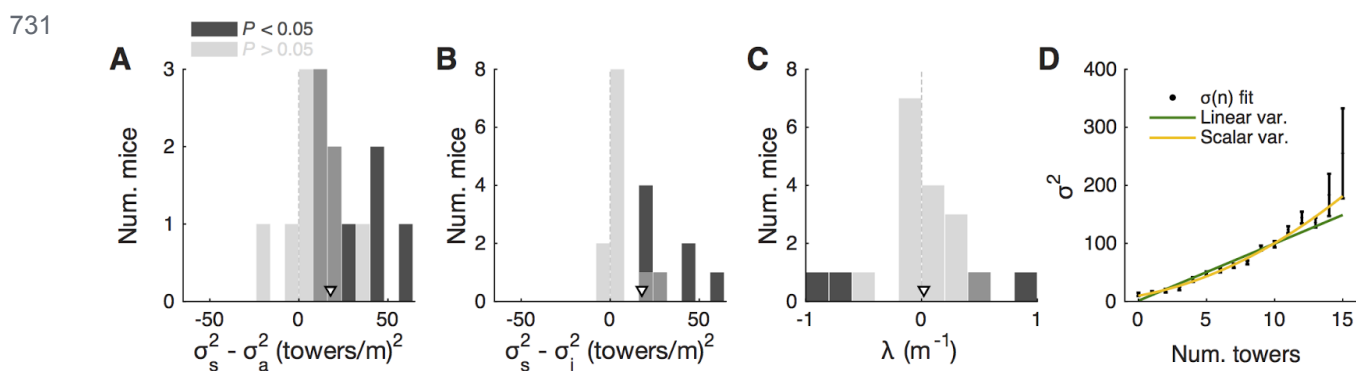

732 **Figure 6 | Behavioral performance seems to be limited by cue-dependent noise. (A)**  
 733 Distribution across mice ( $n = 20$ ) of the difference between best-fit sensory and diffusion noise  
 734 parameters ( $\sigma_s^2$  and  $\sigma_a^2$ , respectively) from the Brunton et al. model, color coded according to  
 735 whether they are significantly different from zero according to 95% confidence intervals  
 736 determined from cross-validation runs. Arrowhead, population mean. **(B)** Distribution across  
 737 mice of the difference between best-fit sensory and initial noise parameters ( $\sigma_s^2$  and  $\sigma_i^2$ ,  
 738 respectively) from the Brunton et al. model. Conventions as in a. **(C)** Distribution of the memory  
 739 leak ( $\lambda$ ) parameter from the Brunton et al. model. Conventions as in a. **(D)** Best-fit parameters

740 for the SDT model (aggregate mouse data). Black data points: parameters from the full model  
741 where  $\sigma^2$  is determined separately for each tower count. Yellow line: prediction from the  
742 two-parameter scalar variability model. Green line: prediction from the two-parameter linear  
743 variance model. Scalar variability yielded significantly better predictions ( $P < 0.003$ ). Error bars:  
744 standard deviation from bootstrapping iterations ( $n = 200$ ).

## 745 **Choice is influenced by previous trial history**

746 Having determined that mice are sensitive to the amount of sensory evidence and that they use  
747 multiple pulses throughout the maze to make their decision, we next investigated how previous  
748 choice and reward history influenced current choice. Rodents have been shown to display  
749 behavioral effects of trial history in a variety of task designs (Busse et al., 2011; Narayanan et al.,  
750 2013; Pinto and Dan, 2015; Scott et al., 2015). In particular, in two-alternative forced choice  
751 tasks in operant conditioning chambers, they are more likely to repeat previously rewarded  
752 choices (Busse et al., 2011; Scott et al., 2015). We were therefore surprised to uncover the  
753 opposite pattern of trial history, albeit of small magnitude: on average, the mice were more likely  
754 to go to the opposite arm to a previously rewarded one, and to repeat an unrewarded choice  
755 (**Figures 7A, B**). This behavior is potentially reminiscent of the well-documented tendency to  
756 spontaneously alternate arms when mice explore a (physical) T-maze (Lalonde, 2002). To better  
757 quantify this effect, we defined the alternation bias for each mouse as the mean-subtracted  
758 percentage of trials in which they chose the arm opposite to their previous choice (see **Materials**  
759 **and Methods** for details). Post-error and post-reward biases did not significantly differ in  
760 magnitude (**Figure 7C**,  $P = 0.48$ , two-sided paired  $t$ -test), although only post-error biases were  
761 significantly different than zero ( $P = 0.006$  and  $0.11$  for post-error and post-reward, respectively,  
762 two-sided  $t$ -test). There was no correlation between the magnitude of post-reward and post-error  
763 biases across mice ( $r = -0.28$ ,  $P = 0.25$ , Pearson's correlation, analysis not shown). Post-error  
764 biases also had a longer time scale than post-reward, going at least five trials in the past (**Figure**  
765 **7D**). Note that for the analysis **Figure 7D** a long-lasting negative bias with respect to trial zero  
766 indicates higher probability of going to same arm over consecutive trials. In other words, this  
767 would indicate the presence of choice perseveration bouts, particularly following an error trial.  
768 To directly assess this, we calculated the alternation bias selecting trials with consecutive  
769 rewards or errors in the same arm (**Figure 7E**). We noted an increase in the magnitude of  
770 negative bias with increasing numbers of consecutive erroneous visits to the same arm, as  
771 expected from the interaction between choice perseveration and our debiasing algorithm. For  
772 example, a mouse that perseverates in going left with little regard to the evidence will cause the  
773 debiasing algorithm to sample more right-rewarded trials, increasing the fraction of consecutive  
774 left-choice, right-rewarded trials. To estimate how these perseveration bouts affected overall  
775 performance, we recomputed the aggregate psychometric curve after removing trial bouts in  
776 which the mice made at least three consecutive identical choices. Applying this additional trial  
777 selection criterion resulted in little performance improvement (**Figure 7F**, and changing the  
778 criterion to more trials did not qualitatively change the results).

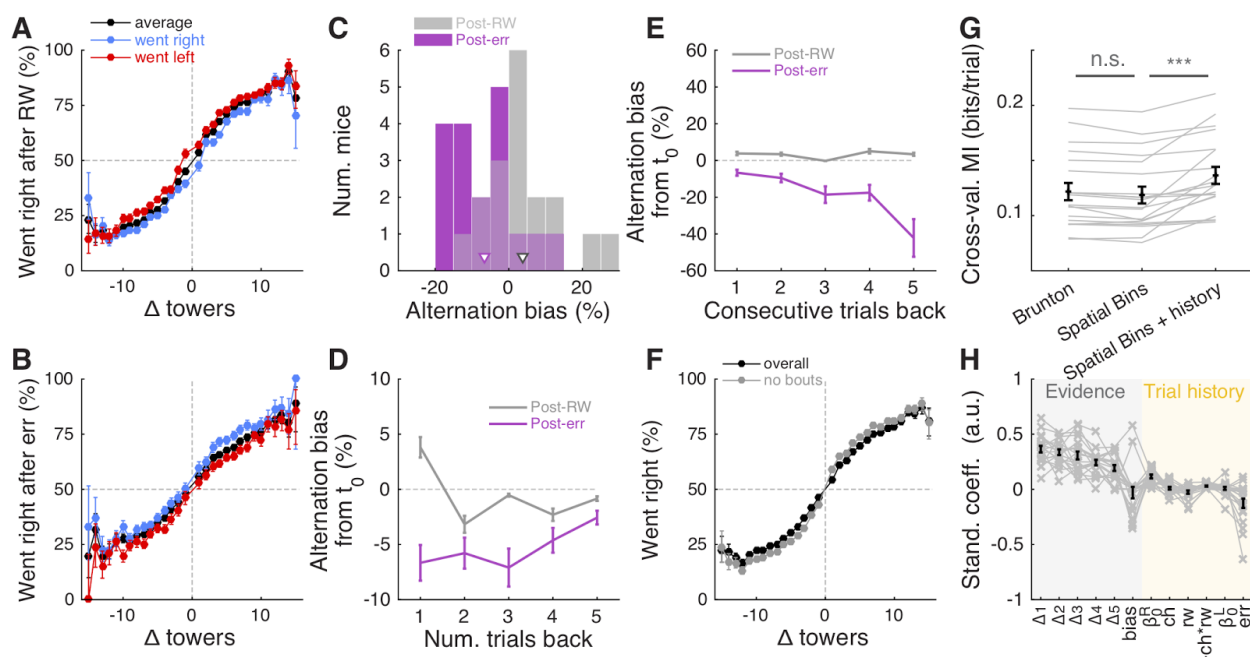

779 **Figure 7 | Choice is moderately influenced by previous trial history.** (A) Psychometric curves  
 780 for aggregate data (metamouse) divided according to previous choice in rewarded trials. Black:  
 781 average post-reward curve, blue: psychometric curve for trials following rewarded right choices,  
 782 red: psychometric curve for trials following rewarded left choices. Error bars: binomial  
 783 confidence intervals. (B) Psychometric curves divided according to previous choice in error  
 784 trials. Conventions as in (A). (C) Distribution of alternation bias after reward (gray) or error  
 785 (magenta) trials. Arrowheads: population mean. (D) Magnitude of alternation bias calculated for  
 786 1 – 5 trials after a choice, separately for rewarded and unrewarded trials. Error bars:  $\pm$  SEM  
 787 across mice ( $n = 18$  with at least 1,000 trials after removing trials with fewer than 5 history  
 788 trials). (E) Magnitude of alternation bias calculated for 1 – 5 trials after identical rewarded or  
 789 unrewarded choices. Error bars:  $\pm$  SEM. (F) Psychometric curves for aggregate data  
 790 (metamouse) with the trial selection adopted throughout the paper (black) and adopting an  
 791 additional criterion to exclude at least 3 consecutive-choice trials (gray). Error bars: binomial  
 792 confidence intervals. (G) Comparison of cross-validated model prediction performance for the  
 793 Brunton et al. DDM, the spatial-bin logistic regression, and the latter plus trial history terms.  
 794 Thin gray lines: individual mice, black lines and error bars: mean  $\pm$  SEM. \*\*\*  $P < 0.001$ . MI:  
 795 model information index. (H) Best-fit standardized coefficients for the spatial bins model with  
 796 trial history terms. Thin gray lines: individual mice, thick black lines: population mean, error  
 797 bars:  $\pm$  SEM.

798 Thus, choice and reward history impacted present choice in the accumulating-towers task. To  
 799 provide a more complete description of the behavior, we added trial history to our behavioral  
 800 models. First, however, we compared the performance of the Brunton et al. DDM to the logistic  
 801 regression model in which choice is a weighted function of the net amount of sensory evidence



802 in different spatial bins (**Figures 2A, B**). This latter heuristic model performed as well as the  
803 Brunton DDM in cross-validated datasets across the population (**Figure 7G**,  $P = 0.58$ ,  $n = 20$ ,  
804 Tukey's post-hoc test after a one-way ANOVA with repeated measures for the three models in  
805 the figure;  $P = 2.4 \times 10^{-6}$  for main effect of model type). We therefore added trial history to the  
806 logistic regression model (**Figure 7H**), adding terms to account for both the observed vertical  
807 shifts in the psychometric curves and the decrease in psychometric slope following errors  
808 (**Figures 7A, B**, see **Materials and Methods** for details). As expected, doing so significantly  
809 increased model performance (**Figure 7G**,  $P = 9.9 \times 10^{-5}$ , Tukey's post-hoc test). Note that this  
810 model has the underlying assumption that the mice adopt a spatial strategy, i.e. that weights are  
811 assigned to net evidence in different segments of the nominal cue region, regardless of how  
812 many towers the mice have seen before reaching that segment. An alternative hypothesis is that  
813 mice weight towers according to the order in which they occur. In this scenario, the first tower in  
814 a trial would have the same impact on the mouse's decision, whether it occurred on the first or  $n^{\text{th}}$   
815 spatial segment. To test for this possibility, we constructed another logistic regression model in  
816 which towers are ranked (in bins of three) according to their ascending order of occurrence  
817 (**Supplementary Figure 6**). The model, which confirmed the predominance of primacy effects  
818 on the behavior (i.e. earlier cues have more weight on the decision), performed marginally better  
819 than its spatial counterpart, with a trend towards significantly better cross-validated predictions  
820 ( $P = 0.07$ ,  $n = 20$ , two-sided paired  $t$ -test, both cases had the same trial history parameters). This  
821 suggests that an internal evidence weighting function that depends on a running numerosity  
822 explains behavior at least as well as one that weighs evidence based on a tower's spatial position.

### 823 **Mice display fairly stereotyped running patterns**

824 Lastly, we turned to the analysis of the mice's running patterns as they navigated the maze. We  
825 characterized the time course of movements that the mice made, as well as how these are  
826 modulated by choice and evidence, as this navigational behavior is presumably reflective of the  
827 ongoing decision process in a given trial. Secondly, we quantified the motor skill element of our  
828 task, as it generally adds to the difficulty and may specifically contribute to the observed lapse  
829 rates of the mice.

830 Inspection of single-trial speed vs. maze position (trial time) traces suggested that mice run at  
831 fairly stereotyped speeds in different portions of the maze (**Supplementary Figure 7A**). Average  
832 running speed in the maze stem across the population was  $61.1 \pm 2.4$  cm/s (**Supplementary**  
833 **Figure 7B**, mean  $\pm$  SEM, range: 44.2 – 92.9), translating into a nominal cue period duration of  
834  $3.4 \pm 0.1$  s (mean  $\pm$  SEM, range: 2.2 – 4.5). Given the broad distribution of speeds we observed  
835 across mice (**Supplementary Figures 7C, D**), we next wondered whether there was any  
836 systematic relationship between running speed and performance across the population. Indeed,  
837 we found a significant correlation between these two indicators, averaged across all sessions  
838 (**Supplementary Figure 7E**,  $r = 0.48$ ,  $P = 0.02$ , Pearson's correlation). In other words, faster  
839 mice tended to perform better. This relationship, however, did not in general hold within  
840 individual mice in a session-by-session analysis (**Supplementary Figure 7F**,  $r = 0.06 \pm 0.05$ ,  
841 mean  $\pm$  SEM).

842 We also sought to analyze how frequently mice made putative motor errors (**Supplementary**  
843 **Figure 7G**). We found an overall low occurrence of trials with unusual motor events, at an  
844 average of  $5.6 \pm 1.0$  % (mean  $\pm$  SEM, excluding low-speed trials, which are 10% by definition,  
845 see **Materials and Methods**). The distribution of these events differed significantly among event  
846 types and between correct and error trials (**Supplementary Figure 7G**, 2-way repeated measures  
847 ANOVA,  $P_{event\ type} = 2.8 \times 10^{-38}$ ,  $P_{trial\ outcome} = 2.6 \times 10^{-5}$ ), with events being more common in error  
848 trials. The frequency of unusual motor events did not depend on trial difficulty (2-way repeated  
849 measures ANOVA,  $P = 0.25$ , data not shown). We thus conclude that while motor aspects did  
850 contribute to error trials, they cannot fully explain the lapse rates.

851 We then turned to the analysis of view angle trajectories. Specifically, we first looked for  
852 statistical correlations between view angle distributions and the animal's behavioral strategy, and  
853 find that these distributions do on average reflect the eventual choice of the animal, as follows.  
854 For each mouse, we calculated the distribution over trials of view angles as a function of y  
855 position in the maze, separately for left and right choice trials (**Figure 8A**). We observed  
856 diverging distributions with increasing y positions, indicating that the animals progressively  
857 turned to their choice side as they ran down the stem of the maze. To better quantify this  
858 phenomenon, we built choice decoders that predicted the future choice based on the current view  
859 angle at a particular y position along the maze stem (see **Materials and Methods**). At  $y = 100$   
860 cm (half-way through the cue period), average decoding accuracy was  $73.1 \pm 1.3\%$  (mean  $\pm$   
861 SEM), whereas at the end of the cue period ( $y = 200$  cm) we could predict choice with an  
862 accuracy of  $87.3 \pm 1.1\%$  (**Figure 8B**). We reasoned that this divergence of view angles during the  
863 cue period could be related to the observed primacy effects (i.e. mouse weighting earlier  
864 evidence more, **Figure 2** and **Supplementary Figure 6**), prompting us to look for such  
865 relationship at the subject level. We thus calculated the correlation between the weight decay  
866 ratio (**Figure 2C**) and choice decoding accuracy at  $y = 100$ . We found a significantly negative  
867 correlation between the two (**Figure 8C**,  $r = -0.71$ ,  $P = 7.6 \times 10^{-5}$ , Pearson's correlation),  
868 indicating that in fact animals integrating more evenly across the maze also tended to run  
869 straighter during the cue period. This finding possibly indicates that they commit later to a  
870 particular decision. In fact, the view angle trajectories of mice were on average modulated by the  
871 strength of evidence within the trial, with view angles diverging earlier towards the target side  
872 (as defined by the eventual choice) for trials with larger magnitudes of  $|\Delta|$  towers (**Figure 8E**).  
873 Although highly variable on a per-trial basis (**Supplementary Figure 7D**), this aspect of the  
874 navigational behavior seemed to be sensitive to parameters of the cognitive strategy employed by  
875 the mice (weighting of cues vs. space, trial difficulty), and may prove useful for future studies.

876 Given the above correlations, we considered the possibility that mice may actually circumvent  
877 the memory demands of the task by using the view angle throughout the maze as a mnemonic for  
878 the side with more evidence. To address this, we looked for timepoint-by-timepoint changes that  
879 could reflect such a mnemonic strategy, e.g. always turning by  $+1^\circ$  every time a right cue  
880 appears. We computed tower-triggered view angles separately for left and right choices,  
881 subtracting the average trajectories for each mouse (**Figure 8D**). As a population, mice exhibit  
882 no pulsatile nor step-like changes in the view angle for at least 50 cm ( $\sim 1$ s) post either left or  
883 right cues, although the aforementioned statistical correlation between view angle and choice is  
884 visible at 80cm post-cues (for cues at the end of the cue period, this corresponds to the location  
885 of the T-maze arms). However, a mnemonic strategy must be carried out on a per-trial basis, and

886 should be evident in the cue-triggered view angle distribution across *trials* (as opposed to across  
 887 mice). The 1-standard-deviation spread of view angle across trials is more than a factor of 5  
 888 times larger than the difference in right/left choice mean view angles for every mouse  
 889 (**Supplementary Figure 8**), which argues strongly against a stereotyped, memoryless mnemonic  
 890 of using an “accumulated” view angle to make a choice.

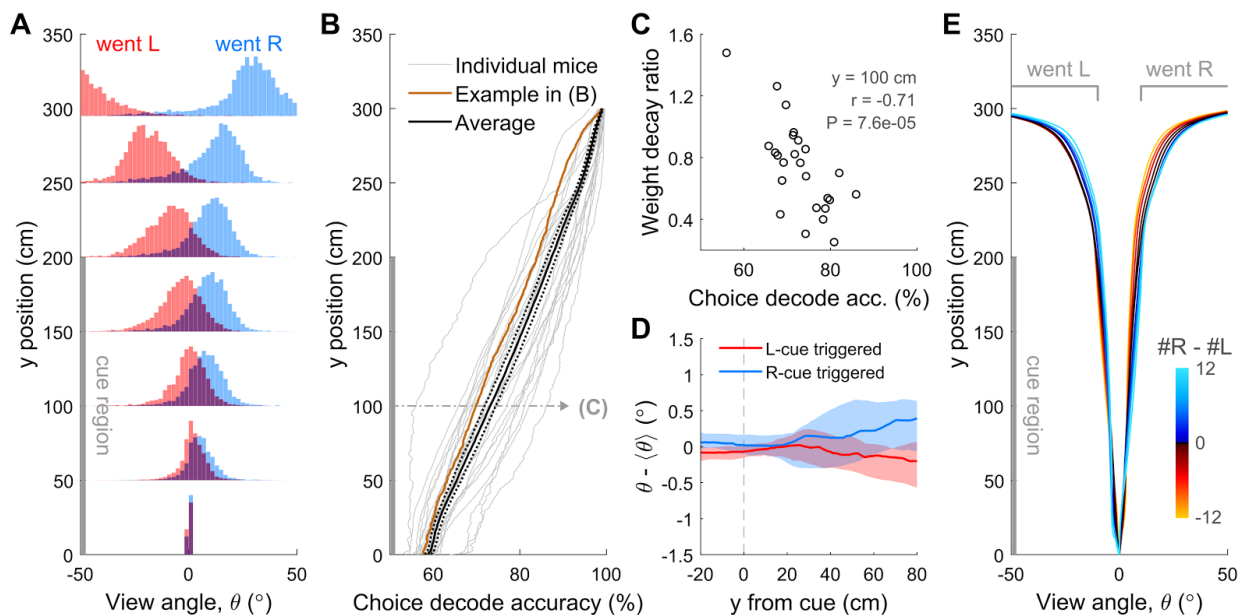

891 **Figure 8 | View angle trajectories.** (A) Distribution of view angles in left and right choice trials  
 892 (arbitrary units, normalized to equal area for both choice categories) for an example mouse,  
 893 sampled at several y positions (0, 50, ..., 250, 295 cm) along the stem of the T-maze. (B)  
 894 Accuracy of decoding the eventual choice of a given mouse using a threshold on the view angle,  
 895 evaluated at various y positions along the T-maze. (C) Scatter plot across mice of the evidence  
 896 weight decay ratio (see **Figure 3C**) vs. the choice decoding accuracy evaluated at halfway into  
 897 the cue region as indicated in (B). (D) Cue-triggered change in the view angle  $\theta$  relative to the  
 898 average trajectory  $\langle \theta \rangle$  for trials of the same choice. The bands indicate the 1 standard deviation  
 899 spread across mice, with the thick lines being the median across mice. (E) Average view angle  
 900 for subsets of left/right choice trials with various values of  $\#R - \#L$  (color code). For a given  
 901 choice, the mean view angle trajectory of individual mice are aligned to the aggregate data  
 902 (metamouse) before averaging.

## 903 DISCUSSION

904 We have developed a new virtual navigation-based, pulsed evidence-accumulation task for  
 905 head-fixed mice, along with tools to quantify their performance and behavioral strategy. We  
 906 show that mice can gradually accumulate visual evidence in virtual reality over seconds. First,  
 907 large numbers of mice from several strains can be reproducibly trained in the task (**Figure 2**,  
 908 **Supplementary Figures 1–4**). Second, using a combination of analytical and modeling  
 909 approaches, we also show that mice solve this task by using multiple pulses of evidence across

910 the cue region, although they tend to slightly overweight earlier evidence (**Figures 3, 7 and**  
911 **Supplementary Figure 6**). Moreover, our analyses suggest that sensory evidence-dependent  
912 noise, but not accumulation memory, is an important performance-limiting factor, much like  
913 analogous tasks in rats and humans (**Figures 5 and 6**) (Brunton et al., 2013; Scott et al., 2015).  
914 An intriguing difference from previous reports was our observation that the mice tended to  
915 alternate instead of repeating a previously rewarded choice (**Figure 7**), unlike what has been  
916 observed in both rats and mice (Busse et al., 2011; Scott et al., 2015). We speculate that this is  
917 related to the mice's tendency to spontaneously alternate their choices in T-mazes (Lalonde,  
918 2002), but note that choice alternation has also been reported in humans performing perceptual  
919 decision making tasks, and has been found to be modulated by the magnitude of uncertainty in  
920 the previous trial (Urai et al., 2017). Finally, analysis of the mice's virtual navigation trajectories  
921 suggested that ongoing behavioral readouts may provide useful proxies for latent cognitive  
922 variables (**Figure 8**), although further studies will be needed to explore that possibility in more  
923 detail. For example, the slight modulation in view angle trajectories by the amount of sensory  
924 evidence could statistically reflect decision confidence (Kepecs et al. 2008), and/or on average  
925 different decision times for trials of different difficulty. Additionally, this feature of the behavior  
926 could potentially be explored to study changes of mind at the level of single trials (Kiani et al.  
927 2014), by explicitly designing the evidence pulse streams to change their underlying rates at  
928 various points in the cue region.

929 A central aspect of the accumulating-towers task is that decision-making must occur while the  
930 animal navigates a (virtual) environment. Despite introducing complexity in the behavioral  
931 training and data analyses, we argue that this is a desirable feature. Natural behavior seldom  
932 occurs in isolated modules, and is instead dynamic and high-dimensional, and it is precisely  
933 these behavioral constraints that are thought to have shaped the evolution of neural circuits  
934 (Darwin, 1998; Gomez-Marin et al., 2014; Krakauer et al., 2017). The study of highly reduced  
935 decision-making behaviors have allowed the field to make large strides in understanding their  
936 underlying neural mechanisms (Brody and Hanks, 2016; Carandini and Churchland, 2013; Gold  
937 and Shadlen, 2007). The study of these processes under more complex contexts should yield  
938 novel insights into how they are flexibly composed to produce real-world solutions.

939 A recent study has described a similar visual evidence-accumulation task for mice navigating in  
940 VR (Morcos and Harvey, 2016). The accumulating-towers task differs from theirs in a few  
941 crucial ways, in terms of stimulus design, task difficulty and apparent strategies adopted by the  
942 mice. We used Poisson-distributed, brief pulses of spatially discrete evidence (200 ms, 12-cm  
943 separation), which resulted in up to 16 cues on one side (median: 4) and up to 25 cues total  
944 (median: 10). Conversely, Morcos and Harvey always had six cues of an optical flow (wallpaper)  
945 nature that were four times as long (~800 ms) and occurred in stereotyped positions throughout  
946 the stem of the maze. The latter design sampled the same stimulus configurations at high  
947 frequencies, which is beneficial for increasing statistical power via averaging. However, we  
948 argue that there are complementary advantages to sampling a much larger region of stimulus  
949 space with spatially random cues. For example, decorrelating cue locations from space/time  
950 allowed us to tease apart the effects of stimulus strength vs. an important aspect of working  
951 memory, i.e. retention time (**Figure 5**), while maintaining a quasi-fixed trial duration. Moreover,  
952 using brief pulses of sensory evidence gives one the ability to study cue-triggered neural  
953 responses (Koay et al., 2016; Scott et al., 2017). This highly heterogeneous design did likely

954 increase task difficulty, which may explain the slightly lower performance we observed  
955 compared to the Morcos and Harvey task. Note, however, that we used deliberately liberal trial  
956 selection criteria, and that when more stringent criteria were applied we could obtain very high  
957 performance sessions (**Figure 2, Supplementary Figure 3**), which might be desirable for neural  
958 recording and perturbation experiments. Interestingly, these task design differences led to  
959 apparent differences in the strategies that the mice employed. Specifically, the mice in the  
960 Morcos and Harvey study displayed more pronounced primacy effects than ours  
961 (**Supplementary Figure 9**).

962 The primacy effects we observed in many of our mice (**Figures 3, 7 and Supplementary Figure**  
963 **6**) agree with several other evidence pulse-based tasks in mice, monkeys and humans (Bronfman  
964 et al., 2016; Kiani et al., 2008; Ludwig et al., 2005; Odoemene et al., 2017; Tsetsos et al., 2012),  
965 but are at odds with findings of temporally even evidence integration in rats performing a  
966 high-rate auditory clicks task (Brunton et al., 2013). The reasons behind these differences are a  
967 matter of ongoing debate. In particular, it has been argued that primacy in pulsed-based tasks is  
968 due to either reaching an accumulator bound (Kiani et al., 2008) or to competition between leaky  
969 integrators that mutually inhibit each other (Tsetsos et al., 2012). Interestingly, it has been  
970 recently shown that in humans the degree of primacy and even the monotonicity of the evidence  
971 weighting curve can change with stimulus duration, which prompted the authors to postulate a  
972 dynamic evidence accumulation mechanism (Bronfman et al., 2016). Thus, it is conceivable that  
973 different decision-making and integration mechanisms might be at play depending on stimulus  
974 and task features (Piet et al., 2017; Uchida et al., 2006). Task design differences could also  
975 explain why we did not observe an improvement in performance with increased stimulus  
976 durations (**Figure 5**), as might be expected if a diffusion-to-bound-type mechanism is at play.  
977 Specifically, our stimulus period durations were longer than when the benefits of prolonged  
978 stimulus saturate (Brunton et al., 2013; Gold and Shadlen, 2007; Kiani et al., 2008). On the other  
979 hand, the finding that behavior in our task was influenced by the number but not duration of cues  
980 is consistent with multiple previous studies of counting in rodents (Mechner 1958; Fernandes  
981 and Church 1982; Gallistel and Gelman 2000; Çavdaroğlu and Balcı 2016). Counting is thought  
982 to be carried out as a magnitude-estimation process that displays the property of scalar  
983 variability, i.e. the noise (standard deviation) in estimates scales linearly with count/magnitude  
984 (Fechner 1860; Gallistel and Gelman 2000). Accordingly, following a recent report in rats (Scott  
985 et al. 2015), we show through modeling that noise in the mice's estimates of the number of  
986 towers in our task scales in a way that is compatible with the phenomenon of scalar variability.  
987 We extend previous findings by showing that, in addition to self-generated lever presses  
988 (Çavdaroğlu and Balcı 2016), mice can accumulate visual stimuli in the context of a perceptual  
989 decision-making task.

990 In summary, the accumulating-towers task is a valuable behavioral tool to study evidence  
991 accumulation and decision-making in mice. The task is conducive to further automation and  
992 scaling, and interesting modifications such as designed stimulus sets can be easily incorporated.  
993 Most importantly, it is readily integratable with any number of optical or electrophysiological  
994 techniques requiring head fixation (Koay et al., 2016; Pinto et al., 2017), allowing us to leverage  
995 the comprehensive mouse toolkit in understanding neural mechanisms underlying this important  
996 cognitive behavior.

997 **Conflict of interest statement**

998 The authors declare no conflict of interest.

999 **Author contributions**

1000 L.P., S.A.K. and B.E. collected the data; L.P., S.A.K., B.E. and A.M.Y. analyzed the data; S.Y.T.,  
1001 L.P. and B.E. and built the VR systems; S.A.K., B.D., B.E., L.P. developed the task and shaping  
1002 procedures with guidance from C.D.B., D.W.T. and I.B.W.; L.P., S.A.K., D.W.T. and C.D.B.  
1003 conceived and wrote the manuscript.

1004 **Funding**

1005 This work was supported by the NIH grant 5U01NS090541 and by the 1F32NS101871 NRSA  
1006 from the NINDS (L.P.).

1007 **Acknowledgments**

1008 We thank B.B. Scott , J.W. Pillow and A.T. Piet for helpful discussions, and S. Stein for technical  
1009 assistance.

1010 **References**

1011 Alyan, S., and Jander, R. (1994). Short-range homing in the house mouse, *Mus musculus*: stages  
1012 in the learning of directions. *Anim. Behav.* 48, 285–298. doi:10.1006/anbe.1994.1242.

1013 Aronov, D., and Tank, D. W. (2014). Engagement of Neural Circuits Underlying 2D Spatial  
1014 Navigation in a Rodent Virtual Reality System. *Neuron* 84, 442–456.  
1015 doi:10.1016/j.neuron.2014.08.042.

1016 Bäckman, C. M., Malik, N., Zhang, Y., Shan, L., Grinberg, A., Hoffer, B. J., et al. (2006).  
1017 Characterization of a mouse strain expressing Cre recombinase from the 3' untranslated  
1018 region of the dopamine transporter locus. *Genesis* 44, 383–390. doi:10.1002/dvg.20228.

1019 Benjamini, Y., and Hochberg, Y. (1995). Controlling the false discovery rate: a practical and  
1020 powerful approach to multiple testing. *J. R. Stat. Soc. Series B Stat. Methodol.* 57, 289–300.

1021 Brody, C. D., and Hanks, T. D. (2016). Neural underpinnings of the evidence accumulator. *Curr.*  
1022 *Opin. Neurobiol.*, 37, 149–157. doi:10.1016/j.conb.2016.01.003.

1023 Bronfman, Z. Z., Brezis, N., and Usher, M. (2016). Non-monotonic temporal-weighting indicates  
1024 a dynamically modulated evidence-integration mechanism. *PLoS Comput. Biol.* 12,

- 1025 e1004667. doi:10.1371/journal.pcbi.1004667.
- 1026 Brunton, B. W., Botvinick, M. M., and Brody, C. D. (2013). Rats and humans can optimally  
1027 accumulate evidence for decision-making. *Science* 340, 95–98.
- 1028 Busse, L., Ayaz, A., Dhruv, N. T., Katzner, S., Saleem, A. B., Schölvinck, M. L., et al. (2011).  
1029 The detection of visual contrast in the behaving mouse. *J. Neurosci.* 31, 11351–11361.
- 1030 Carandini, M., and Churchland, A. K. (2013). Probing perceptual decisions in rodents. *Nat.*  
1031 *Neurosci.* 16, 824–831.
- 1032 Carew, T. J. (2005). *Behavioral Neurobiology*. Sunderland, MA: Sinauer.
- 1033 Çavdaroglu, B., and Balci, F. (2016). Mice can count and optimize count-based decisions.  
1034 *Psychon. Bull. Rev.* 23, 871–876.
- 1035 Chatterjee, S., and Hadi, A. S. (2015). *Regression Analysis by Example*. John Wiley & Sons.
- 1036 Chen, T.-W., Wardill, T. J., Sun, Y., Pulver, S. R., Renninger, S. L., Baohan, A., et al. (2013).  
1037 Ultrasensitive fluorescent proteins for imaging neuronal activity. *Nature* 499, 295–300.
- 1038 Dana, H., Chen, T.-W., Hu, A., Shields, B. C., Guo, C., Looger, L. L., et al. (2014).  
1039 Thy1-GCaMP6 transgenic mice for neuronal population imaging in vivo. *PLoS One* 9,  
1040 e108697. doi:10.1371/journal.pone.0108697.
- 1041 Darwin, C. (1998). *The Expression of the Emotions in Man and Animals*. New York, NY: Oxford  
1042 University Press.
- 1043 Deisseroth, K. (2011). Optogenetics. *Nat. Methods* 8, 26–29.
- 1044 Dombeck, D. A., Khabbaz, A. N., Collman, F., Adelman, T. L., and Tank, D. W. (2007). Imaging  
1045 Large-Scale Neural Activity with Cellular Resolution in Awake, Mobile Mice. *Neuron* 56,  
1046 43–57.
- 1047 Dombeck, D. A., and Reiser, M. B. (2012). Real neuroscience in virtual worlds. *Curr. Opin.*  
1048 *Neurobiol.* 22, 3–10. doi:10.1016/j.conb.2011.10.015.
- 1049 Erlich, J. C., Brunton, B. W., Duan, C. A., Hanks, T. D., and Brody, C. D. (2015). Distinct effects  
1050 of prefrontal and parietal cortex inactivations on an accumulation of evidence task in the rat.  
1051 *Elife* 4, e0547.
- 1052 Etienne, A. S., Maurer, R., and Séguinot, V. (1996). Path integration in mammals and its  
1053 interaction with visual landmarks. *J. Exp. Biol.* 199, 201–209.
- 1054 Fechner, G. (1860). *Elements of psychophysics*. Leipzig: Breitkopf and Hartel, 1860. Trans. H.  
1055 Adler, New York, NY: Holt, Reinhart, and Winston, 1966.
- 1056 Feng, G., Mellor, R. H., Bernstein, M., Keller-Peck, C., Nguyen, Q. T., Wallace, M., et al.  
1057 (2000). Imaging neuronal subsets in transgenic mice expressing multiple spectral variants of

- 1058 GFP. *Neuron* 28, 41–51.
- 1059 Fernandes, D. M., and Church, R. M. (1982). Discrimination of the number of sequential events  
1060 by rats. *Anim. Learn. Behav.* 10, 171–176.
- 1061 Gallistel, C. R., and Gelman, I., I. (2000). Non-verbal numerical cognition: from reals to  
1062 integers. *Trends Cogn. Sci.* 4, 59–65.
- 1063 Gold, J. I., and Shadlen, M. N. (2007). The neural basis of decision making. *Annu. Rev. Neurosci.*  
1064 30, 535–574.
- 1065 Gomez-Marin, A., Paton, J. J., Kampff, A. R., Costa, R. M., and Mainen, Z. F. (2014). Big  
1066 behavioral data: psychology, ethology and the foundations of neuroscience. *Nat. Neurosci.*  
1067 17, 1455–1462. doi:10.1038/nn.3812.
- 1068 Gorski, J. A., Talley, T., Qiu, M., Puelles, L., Rubenstein, J. L. R., and Jones, K. R. (2002).  
1069 Cortical excitatory neurons and glia, but not GABAergic neurons, are produced in the  
1070 Emx1-expressing lineage. *J. Neurosci.* 22, 6309–6314. doi:20026564.
- 1071 Guo, Z. V., Li, N., Huber, D., Ophir, E., Gutnisky, D., Ting, J. T., et al. (2014). Flow of cortical  
1072 activity underlying a tactile decision in mice. *Neuron* 81, 179–194.  
1073 doi:10.1016/j.neuron.2013.10.020.
- 1074 Hanks, T. D., Kopec, C. D., Brunton, B. W., Duan, C. A., Erlich, J. C., and Brody, C. D. (2015).  
1075 Distinct relationships of parietal and prefrontal cortices to evidence accumulation. *Nature*  
1076 520, 220–223.
- 1077 Harvey, C. D., Coen, P., and Tank, D. W. (2012). Choice-specific sequences in parietal cortex  
1078 during a virtual-navigation decision task. *Nature* 484, 62–68.
- 1079 Harvey, C. D., Collman, F., Dombeck, D. A., and Tank, D. W. (2009). Intracellular dynamics of  
1080 hippocampal place cells during virtual navigation. *Nature* 461, 941–946.
- 1081 Hu, F., Zhang, L.-X., and He, X. (2009). Efficient randomized-adaptive designs. *Ann. Stat.* 37,  
1082 2543–2560.
- 1083 Jaramillo, S., and Zador, A. M. (2014). Mice and rats achieve similar levels of performance in an  
1084 adaptive decision-making task. *Front. Syst. Neurosci.* 8, 173. doi:10.3389/fnsys.2014.00173
- 1085 Kepecs, A., Uchida, N., Zariwala, H. A., and Mainen, Z. F. (2008). Neural correlates,  
1086 computation and behavioural impact of decision confidence. *Nature* 455, 227–231.
- 1087 Kiani, R., Hanks, T. D., and Shadlen, M. N. (2008). Bounded integration in parietal cortex  
1088 underlies decisions even when viewing duration is dictated by the environment. *J. Neurosci.*  
1089 28, 3017–3029. doi:10.1523/JNEUROSCI.4761-07.2008.
- 1090 Kiani, R., Cueva, C. J., Reppas, J. B., and Newsome, W. T. (2014). Dynamics of Neural  
1091 Population Responses in Prefrontal Cortex Indicate Changes of Mind on Single Trials. *Curr.*



- 1092 *Biol.* 24, 1542–1547.
- 1093 Koay, S. A., Engelhard, B., Pinto, L., Deverett, B., Thiberge, S. Y., Brody, C. D., et al. (2016).  
1094 Neural dynamics in a mouse navigation and accumulation of visual evidence task. *Society*  
1095 *for Neuroscience Abstracts*, 739.07.
- 1096 Krakauer, J. W., Ghazanfar, A. A., Gomez-Marin, A., MacIver, M. A., and Poeppel, D. (2017).  
1097 Neuroscience needs behavior: correcting a reductionist bias. *Neuron* 93, 480–490.  
1098 doi:10.1016/j.neuron.2016.12.041.
- 1099 Lalonde, R. (2002). The neurobiological basis of spontaneous alternation. *Neurosci. Biobehav.*  
1100 *Rev.* 26, 91–104.
- 1101 Licata, A. M., Kaufman, M. T., Raposo, D., Ryan, M. B., Sheppard, J. P., and Churchland, A. K.  
1102 (2017). Posterior parietal cortex guides visual decisions in rats. *J. Neurosci.* 37, 4954–4966.  
1103 doi:10.1523/JNEUROSCI.0105-17.2017.
- 1104 Low, R. J., Gu, Y., and Tank, D. W. (2014). Cellular resolution optical access to brain regions in  
1105 fissures: Imaging medial prefrontal cortex and grid cells in entorhinal cortex. *Proceedings*  
1106 *of the National Academy of Sciences* 111, 18739–18744. doi:10.1073/pnas.1421753111.
- 1107 Ludwig, C. J. H., Gilchrist, I. D., McSorley, E., and Baddeley, R. J. (2005). The temporal  
1108 impulse response underlying saccadic decisions. *J. Neurosci.* 25, 9907–9912.  
1109 doi:10.1523/JNEUROSCI.2197-05.2005.
- 1110 Luo, L., Callaway, E. M., and Svoboda, K. (2008). Genetic Dissection of Neural Circuits.  
1111 *Neuron* 57, 634–660.
- 1112 Madisen, L., Garner, A. R., Shimaoka, D., Chuong, A. S., Klapoetke, N. C., Li, L., et al. (2015).  
1113 Transgenic mice for intersectional targeting of neural sensors and effectors with high  
1114 specificity and performance. *Neuron* 85, 942–958. doi:10.1016/j.neuron.2015.02.022.
- 1115 Mayrhofer, J. M., Skreb, V., von der Behrens, W., Musall, S., Weber, B., and Haiss, F. (2013).  
1116 Novel two-alternative forced choice paradigm for bilateral vibrotactile whisker frequency  
1117 discrimination in head-fixed mice and rats. *J. Neurophysiol.* 109, 273–284.  
1118 doi:10.1152/jn.00488.2012.
- 1119 Mechner, F. (1958). Probability relations within response sequences under ratio reinforcement. *J.*  
1120 *Exp. Anal. Behav.* 1, 109–121.
- 1121 Minderer, M., Harvey, C. D., Donato, F., and Moser, E. I. (2016). Neuroscience: virtual reality  
1122 explored. *Nature* 533, 324–325.
- 1123 Morcos, A. S., and Harvey, C. D. (2016). History-dependent variability in population dynamics  
1124 during evidence accumulation in cortex. *Nat. Neurosci.* 19, 1672–1681.  
1125 doi:10.1038/nn.4403.
- 1126 Narayanan, N. S., Cavanagh, J. F., Frank, M. J., and Laubach, M. (2013). Common medial

- 1127 frontal mechanisms of adaptive control in humans and rodents. *Nat. Neurosci.* 16,  
1128 1888–1895.
- 1129 Odoemene, O., Nguyen, H., and Churchland, A. K. (2017). Visual evidence accumulation  
1130 behavior in unrestrained mice. *bioRxiv*, 195792. doi:10.1101/195792.
- 1131 Paninski, L., Shoham, S., Fellows, M. R., Hatsopoulos, N. G., and Donoghue, J. P. (2004).  
1132 Superlinear population encoding of dynamic hand trajectory in primary motor cortex. *J.*  
1133 *Neurosci.* 24, 8551–8561. doi:10.1523/JNEUROSCI.0919-04.2004.
- 1134 Piet, A., El Hady, A., and Brody, C. D. (2017). Rats optimally accumulate and discount evidence  
1135 in a dynamic environment. *bioRxiv* 204248; doi: <https://doi.org/10.1101/204248>
- 1136 Pillow, J. W., Shlens, J., Paninski, L., Sher, A., Litke, A. M., Chichilnisky, E. J., et al. (2008).  
1137 Spatio-temporal correlations and visual signalling in a complete neuronal population.  
1138 *Nature* 454, 995–999.
- 1139 Pinto, L., and Dan, Y. (2015). Cell-type-specific activity in prefrontal cortex during goal-directed  
1140 behavior. *Neuron* 87, 437–450. doi:10.1016/j.neuron.2015.06.021.
- 1141 Pinto, L., Koay, S. A., Thiberge, S. Y., Tank, D. W., and Brody, C. D. (2017). Widespread  
1142 cortical involvement in virtual evidence-based navigation. in *Society for Neuroscience*  
1143 *Abstracts*, 080.16.
- 1144 Raposo, D., Kaufman, M. T., and Churchland, A. K. (2014). A category-free neural population  
1145 supports evolving demands during decision-making. *Nat. Neurosci.*, 17, 1784–1792.  
1146 doi:10.1038/nn.3865.
- 1147 Ratcliff, R., and Rouder, J. N. (1998). Modeling response times for two-choice decisions.  
1148 *Psychol. Sci.* 9, 347–356.
- 1149 Rickgauer, J. P., Deisseroth, K., and Tank, D. W. (2014). Simultaneous cellular-resolution optical  
1150 perturbation and imaging of place cell firing fields. *Nat. Neurosci.* 17, 1816–1824.  
1151 doi:10.1038/nn.3866.
- 1152 Schmidt, M. (2010). Graphical model structure learning using  $L_1$ -regularization. Dissertation.  
1153 Vancouver, CA: University of British Columbia.
- 1154 Scott, B. B., Constantinople, C. M., Akrami, A., Hanks, T. D., Brody, C. D., and Tank, D. W.  
1155 (2017). Fronto-parietal cortical circuits encode accumulated evidence with a diversity of  
1156 timescales. *Neuron* 95, 385–398. doi:10.1016/j.neuron.2017.06.013.
- 1157 Scott, B. B., Constantinople, C. M., Erlich, J. C., Tank, D. W., and Brody, C. D. (2015). Sources  
1158 of noise during accumulation of evidence in unrestrained and voluntarily head-restrained  
1159 rats. *Elife* 4, e11308.
- 1160 Smith, P. L., and Ratcliff, R. (2004). Psychology and neurobiology of simple decisions. *Trends*  
1161 *Neurosci.* 27, 161–168. doi:10.1016/j.tins.2004.01.006.

- 1162 Sofroniew, N. J., Flickinger, D., King, J., and Svoboda, K. (2016). A large field of view  
1163 two-photon mesoscope with subcellular resolution for in vivo imaging. *Elife* 5, e14472.
- 1164 Song, A., Charles, A. S., Koay, S. A., Gauthier, J. L., Thiberge, S. Y., Pillow, J. W., et al. (2017).  
1165 Volumetric two-photon imaging of neurons using stereoscopy (vTwINS). *Nat. Methods* 14,  
1166 420–426. doi:10.1038/nmeth.4226.
- 1167 Stopka, P., and Macdonald, D. W. (2003). Way-marking behaviour: an aid to spatial navigation in  
1168 the wood mouse (*Apodemus sylvaticus*). *BMC Ecol.* 3, 3.
- 1169 Svoboda, K., and Yasuda, R. (2006). Principles of two-photon excitation microscopy and its  
1170 applications to neuroscience. *Neuron* 50, 823–839.
- 1171 Tsetsos, K., Gao, J., McClelland, J. L., and Usher, M. (2012). Using time-varying evidence to  
1172 test models of decision dynamics: bounded diffusion vs. the leaky competing accumulator  
1173 model. *Front. Neurosci.* 6, 79. doi:10.3389/fnins.2012.00079.
- 1174 Uchida, N., Kepecs, A., and Mainen, Z. F. (2006). Seeing at a glance, smelling in a whiff: rapid  
1175 forms of perceptual decision making. *Nat. Rev. Neurosci.* 7, 485–491. doi:10.1038/nrn1933.
- 1176 Urai, A. E., Braun, A., and Donner, T. H. (2017). Pupil-linked arousal is driven by decision  
1177 uncertainty and alters serial choice bias. *Nat. Commun.* 8, 14637.  
1178 doi:10.1038/ncomms14637.
- 1179 Zhao, S., Ting, J. T., Atallah, H. E., Qiu, L., Tan, J., Gloss, B., et al. (2011). Cell type-specific  
1180 channelrhodopsin-2 transgenic mice for optogenetic dissection of neural circuitry function.  
1181 *Nat. Methods* 8, 745–752.

## Supplementary Materials

### **An accumulation-of-evidence task using visual pulses for mice navigating in virtual reality**

Lucas Pinto <sup>1,\*</sup>, Sue Ann Koay <sup>1,\*</sup>, Ben Engelhard <sup>1</sup>, Alice M. Yoon <sup>1</sup>, Ben Deverett <sup>1,6</sup>, Stephan Y. Thiberge <sup>2</sup>, Ilana B. Witten <sup>1,3</sup>, David W. Tank <sup>1,2,4,#</sup>, Carlos D. Brody <sup>1,4,5,#</sup>

<sup>1</sup> Princeton Neuroscience Institute, <sup>2</sup> Bezos Center for Neural Dynamics, <sup>3</sup> Department of Psychology, <sup>4</sup> Department of Molecular Biology, <sup>5</sup> Howard Hughes Medical Institute, Princeton University, Princeton, NJ, 08544, <sup>6</sup> Robert Wood Johnson Medical School, New Brunswick, NJ

\*, # these authors contributed equally to this work

## Supplementary Figures, Movie and Table

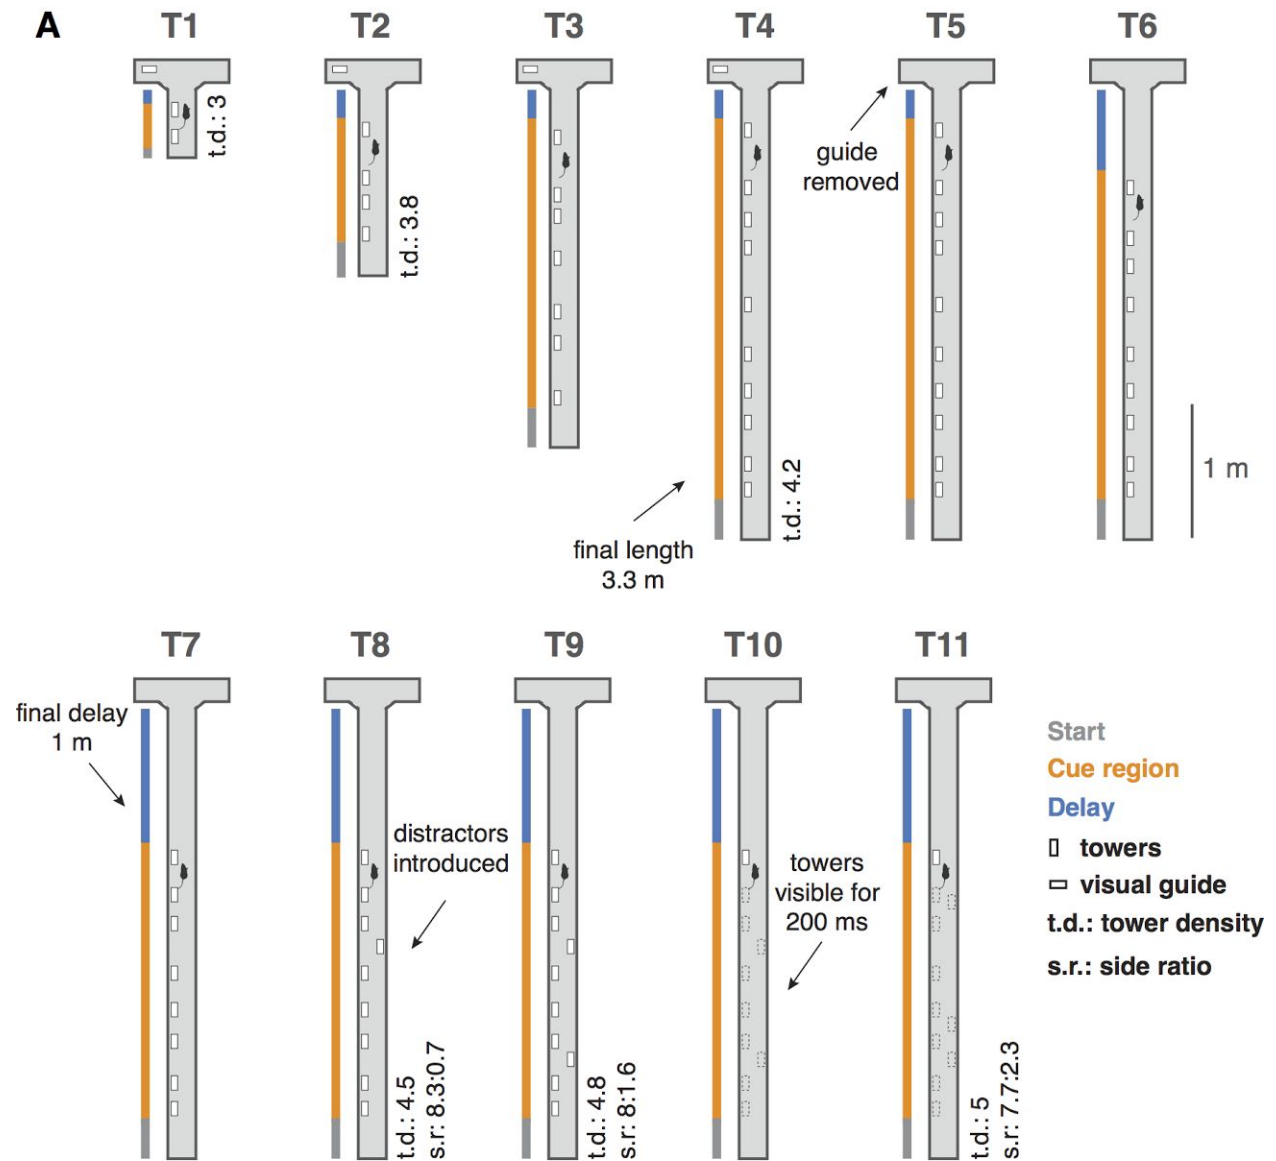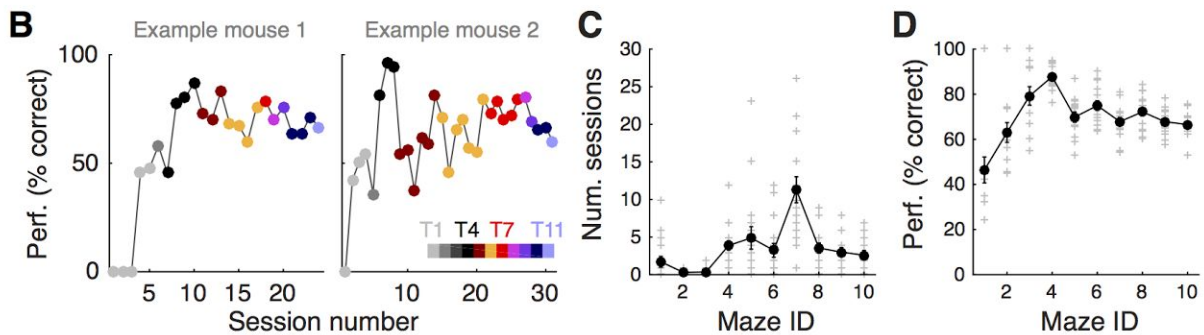

**Supplementary Figure 1 | Shaping.** (A) Schematic illustration of the 10 different shaping mazes (T1 – T10) and the final accumulation maze (T11). (B) Progression through shaping stages of two example mice, where each color indicates a different maze according to the colorbar on the bottom right. (C) Number of sessions training sessions spent on each shaping stage. Gray crosses: individual mice, black circles: population mean ( $n = 17$ ), error bars:  $\pm$  SEM. (D) Average overall performance for each shaping stage. Conventions as in (C).

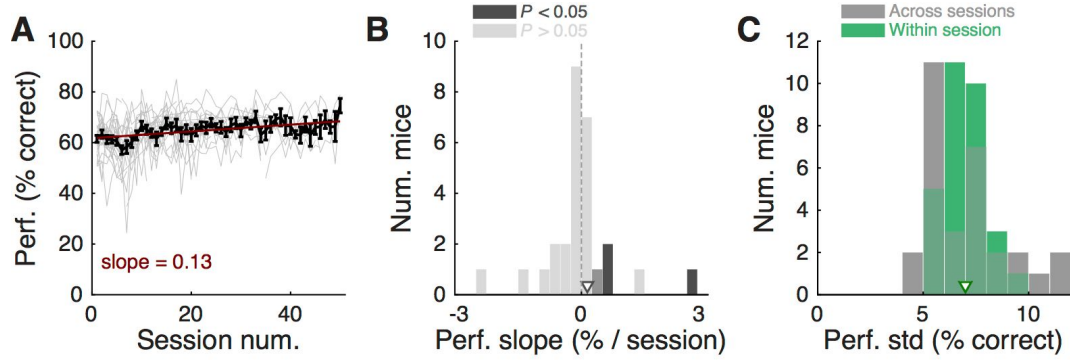

**Supplementary Figure 2 | Mice display stable performance over many sessions. (A)** Overall performance in the final accumulation maze as a function of session number, for mice with at least 5 sessions ( $n = 30$ ), and selecting all trials regardless of overall performance (i.e. not applying any performance thresholds). Thin gray lines: individual mice, black line: average across mice, error bars:  $\pm$  SEM. Red line is best linear fit to average data. **(B)** Distribution of slopes extracted from best-fitting lines to performance of each mouse as a function of session number (i.e. thin gray lines in panel A). Bars are color-coded according to whether the slope is significant (dark gray, i.e. its 95% confidence interval does not overlap zero) or not (light gray). Arrowhead indicates population mean. The distribution was not significantly different from zero ( $P = 0.99$ , signed rank test), indicating stable performance across sessions. **(C)** Distribution of standard deviation of average performance across (gray) and within (green) sessions for the mice. Arrowheads: population means. Within-session standard deviation was calculated using performance over a 40-trial running window.

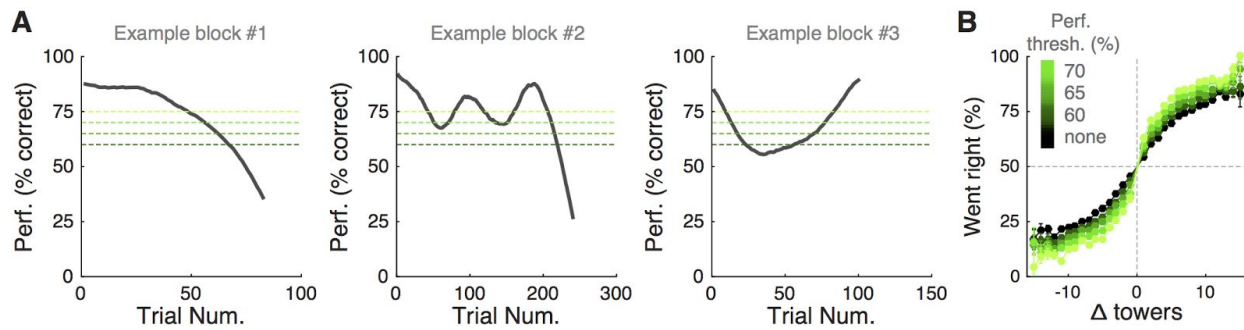

**Supplementary Figure 3 | Mice can undergo bouts of high/low performance (A)** Three individual examples of consecutive trial blocks on the final accumulation maze, showing performance calculated with a sliding half-Gaussian window ( $\sigma = 15$  trials), plotted as a function of trial number (trial 1 is the first within the block, not necessarily the first in the session). Dotted lines of different shades of green indicate performance thresholds applied in the analysis shown in D. **(B)** Psychometric curves for aggregate data (metamouse), obtain after excluding trials with performance below different thresholds (illustrated in A).



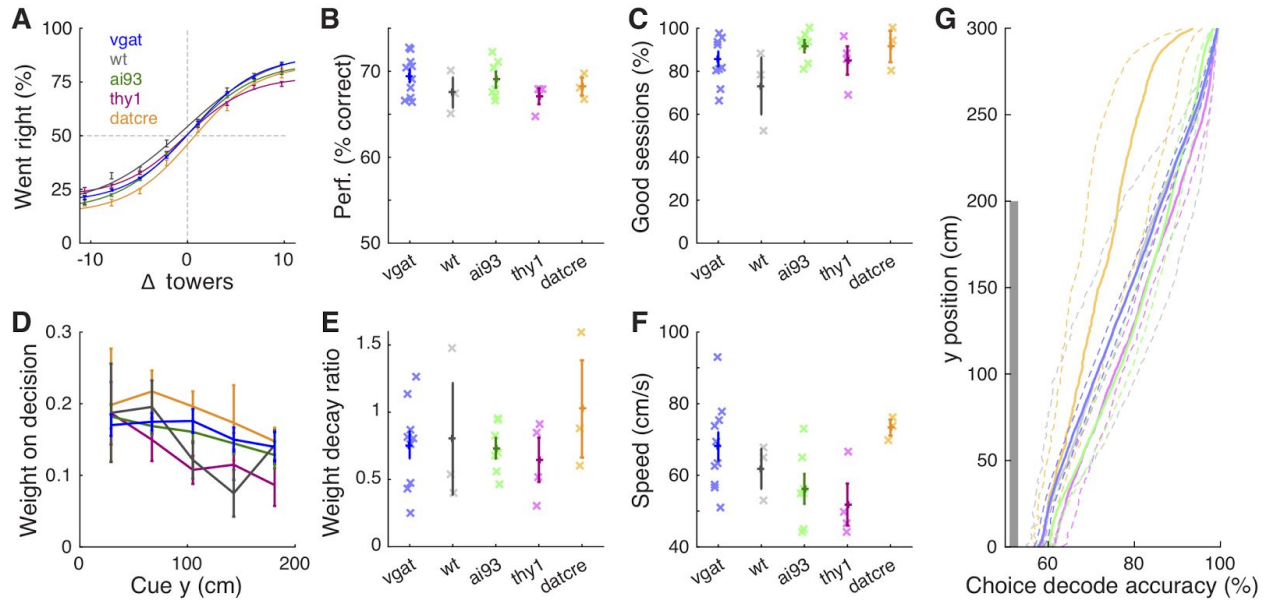

**Supplementary Figure 4 | Different mouse strains have comparable performance.** (A) Psychometric curves for aggregate data (metamouse) divided into five different strains according to the color code on the top left. Error bars: binomial confidence intervals, lines: best sigmoidal function fits. (B) Overall performance averaged across blocks with performance over 60% (see Materials and Methods). Crosses: individual animals, error bars: SEM for each mouse strain. (C) Percentage of sessions with at least one trial block over our performance threshold (60%). Conventions as in B. (D) Logistic regression of choice on net evidence for each spatial bin. (E) Weight decay index according to genotype. Conventions as in B. (F) Average running speed, conventions as in B. (G) Accuracy of decoding choice from view angle as a function of maze position for different strains. For all but one measure above, there was no significant difference between the different strains, ( $P > 0.05$ , one-way ANOVA)(Decoding accuracy was measured in the cue period,  $y < 200$  cm). The exception was running speed, significantly different between genotypes ( $P = 0.04$ ).

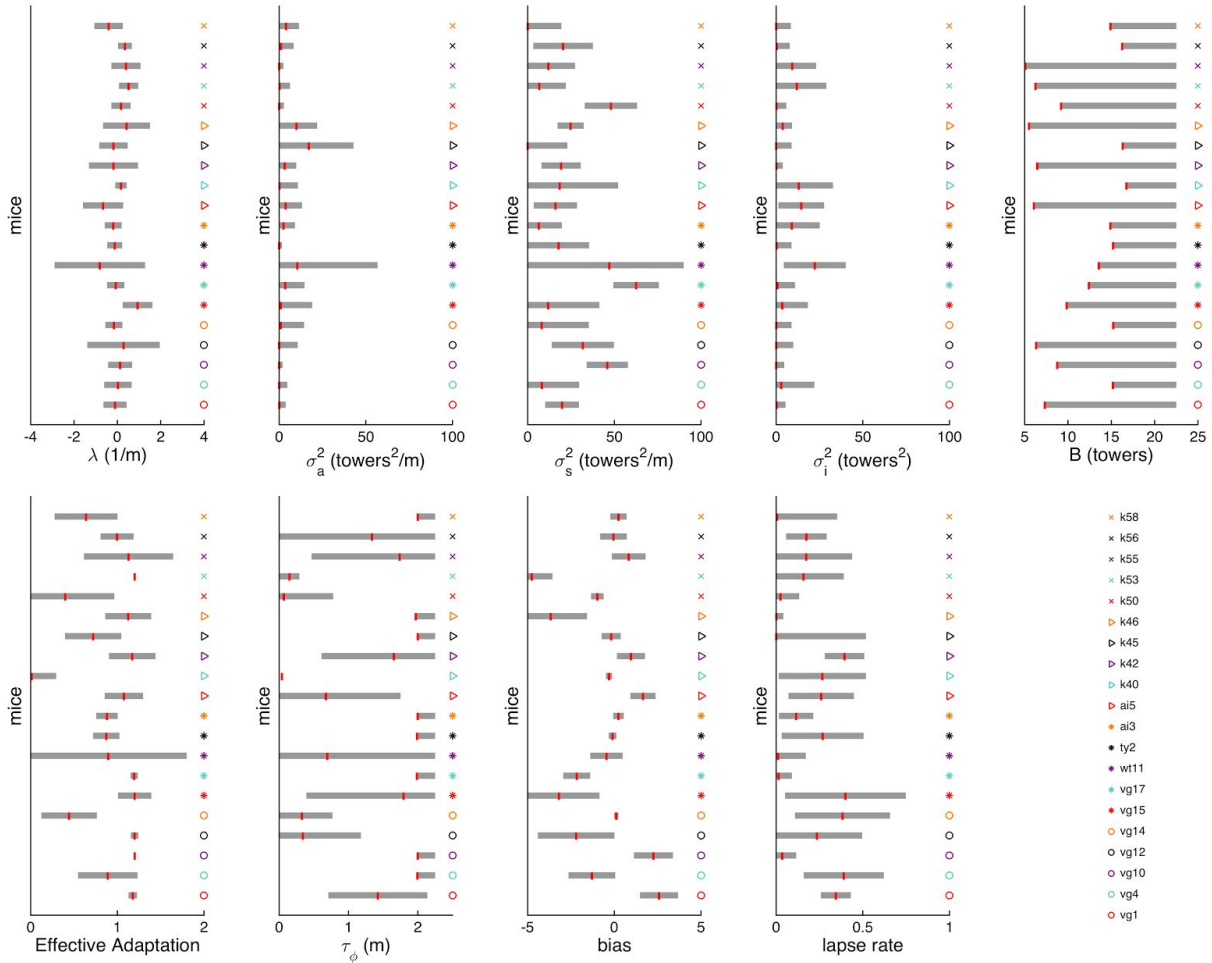

**Supplementary Figure 5 | Best-fit parameters for the Brunton et al. model for each mouse. (A) – (I).** Vertical red bars indicate the median of best-fit parameters across cross-validation runs, gray shadings indicate one standard deviation of the distribution obtained from cross-validation runs. All panels are sorted according to the same mouse order.

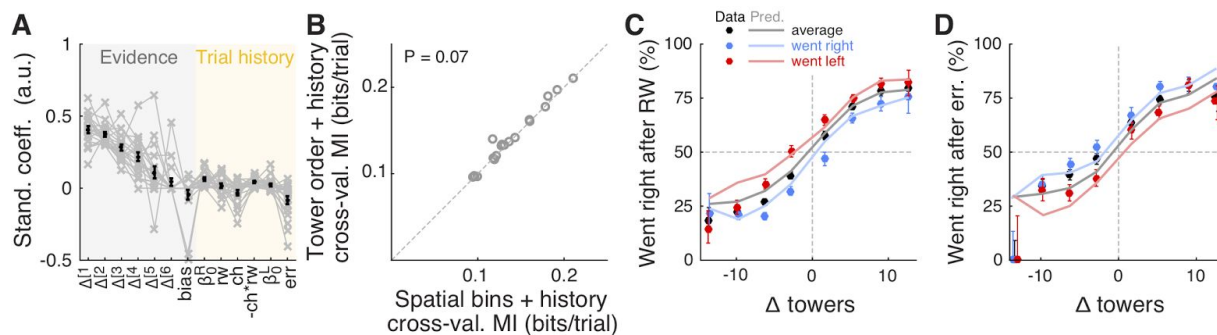

**Supplementary Figure 6 | Tower order explains behavior at least as well as position does.**

**(A)** Best-fit model coefficients for the tower order model with trial history terms. Thin gray lines: individual mice, thick black lines: population mean, error bars:  $\pm$  SEM. **(B)** Comparison of cross-validated prediction performance of the spatial bins and tower order models, both with trial history ( $n = 20$  mice). MI: model information index. **(C)** Psychometric curve predictions for an example mouse with large trial history effects, divided according to previous choice in rewarded trials. Circles: data, lines: model prediction. Black: average post-reward curve, blue: trials following rewarded right choices, red: trials following rewarded left choices. Error bars: binomial confidence intervals. **(D)** Psychometric curve predictions for the same mouse in (C), divided according to previous choice in error trials. Conventions as in (C).

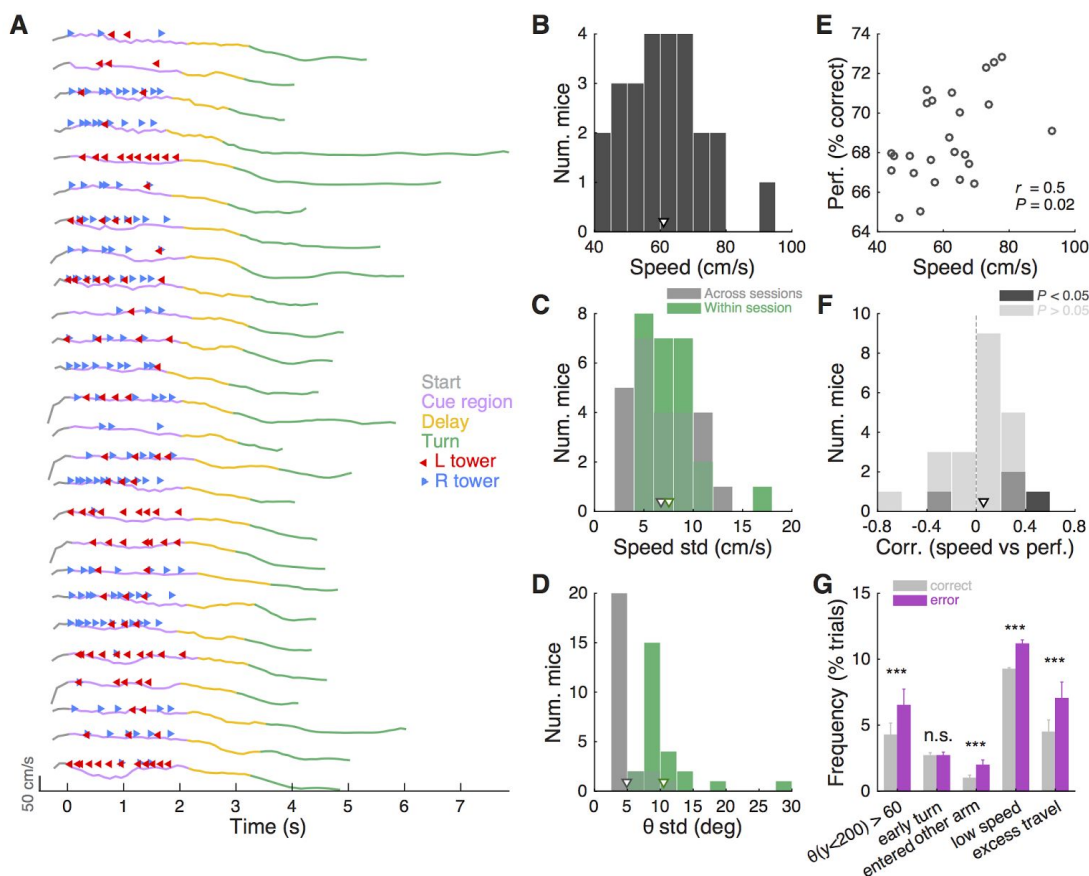

**Supplementary Figure 7 | Stability of running patterns.** (A) Examples of running speed over time during 25 consecutive trials, aligned by entry in the cue region ( $t = 0$ ). Each line is color-coded according to the portion of the maze (start, cue, delay or turn). Tower onset times are shown as leftward red or rightward blue arrows on top of each trace. (B) Distribution of average running speed across trials and sessions for animals with at least 1000 trials ( $n = 25$ ). Arrowhead indicates population mean. (C) Distribution of standard deviations of average running speed across session-wide averages (gray, mean  $\pm$  SEM:  $6.7 \pm 0.6$  cm/s) and across trials within a session (green, mean  $\pm$  SEM:  $7.5 \pm 0.6$  cm/s). Arrowheads indicate population mean, and follow the same color code. (D) Distribution of standard deviations of average view angle across sessions and across trials within a session, calculated separately for right- and left-choice trials and then averaged (mean  $\pm$  SEM:  $4.9 \pm 0.4^\circ$  vs.  $10.4 \pm 0.9^\circ$ , respectively). Conventions as in C. (E) Correlation between average running speed and average overall performance across all sessions for each mouse ( $n = 25$ ,  $r = 0.48$ ,  $P = 0.02$ , Pearson's correlation). (F) Distribution of session-wise correlations between average running speed and average overall performance, showing that although there is an overall correlation between the two indicators, for any given mouse there is little correlation of speed and performance on individual sessions: only 4/25 mice had significant correlations between running speed and performance across sessions, and the sign of the correlation was negative for one of these mice ( $r = 0.06 \pm 0.05$ , mean  $\pm$  SEM). (G) Average frequency of different types of putative motor errors, belonging to five categories: trials with large-magnitude view angles during the cue period ( $>$

60°), trials with early turns (i.e. a turn immediately before the arm, resulting in a wall collision), trials in which the mouse first entered the opposite arm to its final choice, trials with speeds below the 10th percentile (defined separately for each mouse), and trials with traveled distance in excess of 110% of nominal maze length. Frequency was calculated separately for correct and error trials. Error bars,  $\pm$  SEM. \*\*\*  $P < 0.001$ , n.s.: not significant.

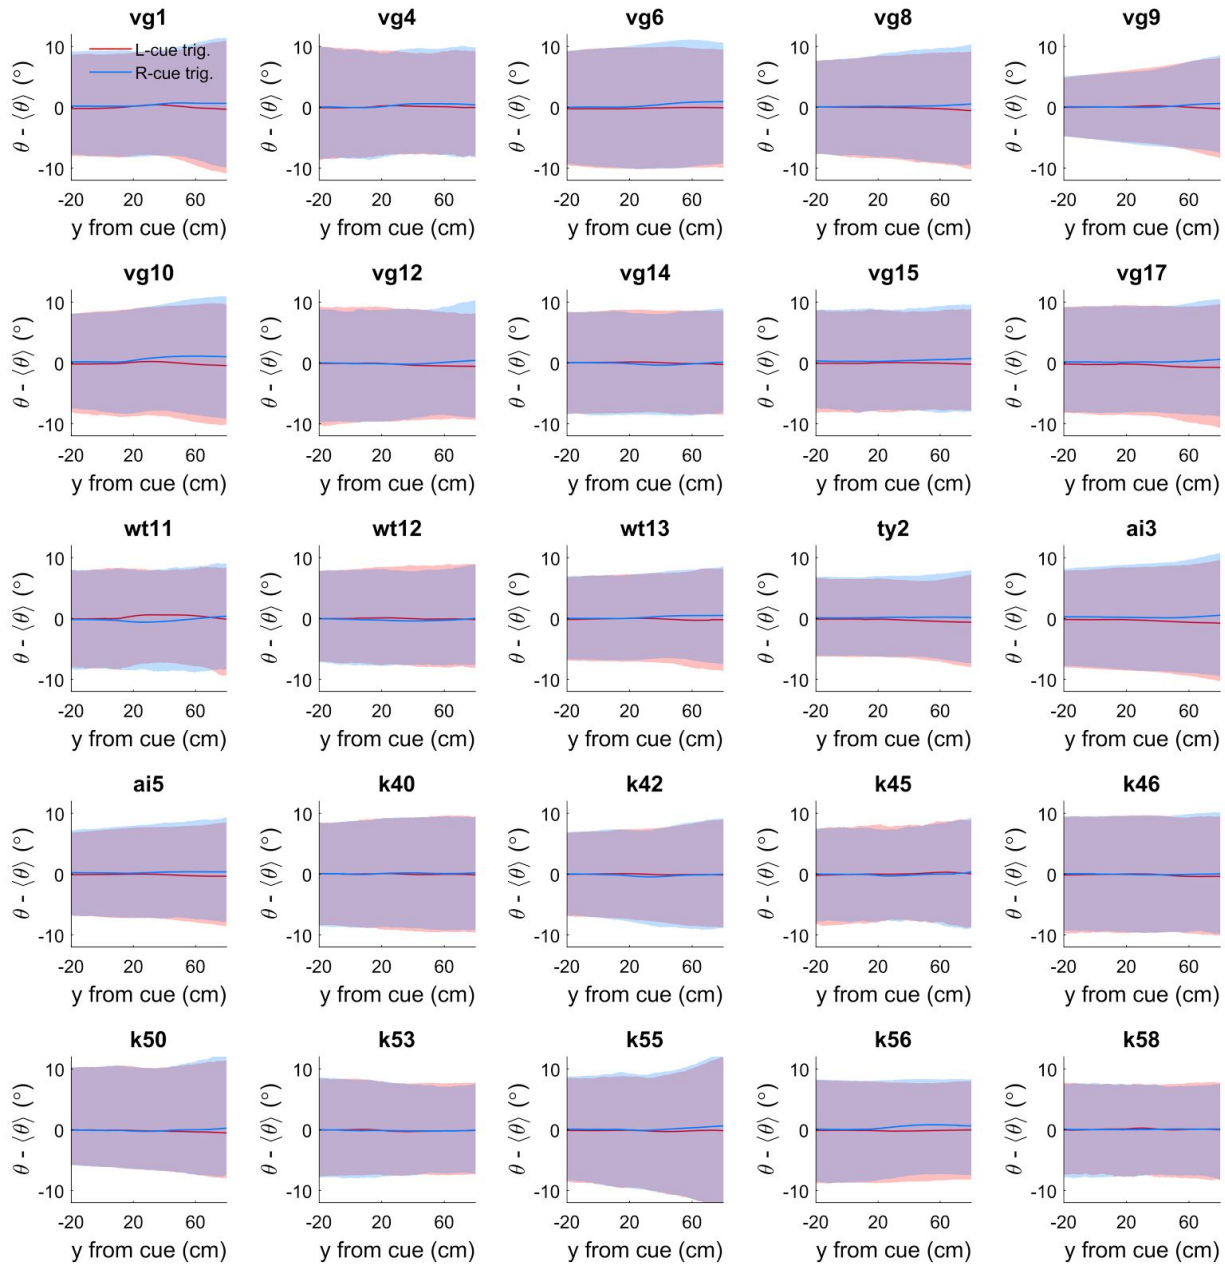

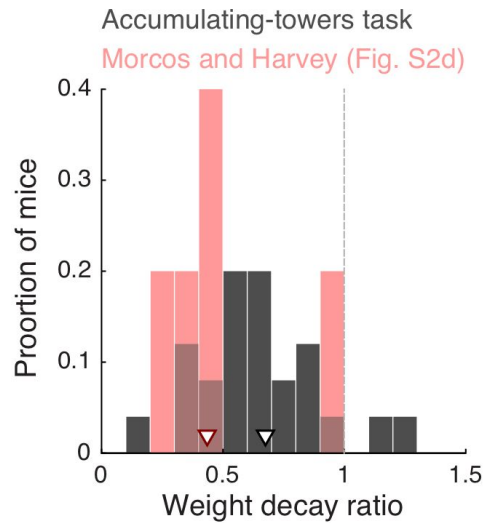

**Supplementary Figure 9 | Comparison between the degree of primacy in the accumulating-towers and the Morcos and Harvey tasks.** For direct comparison with the Morcos and Harvey task, we recalculated the logistic regression from the final accumulation maze of our task using 6 bins. Data from Supplementary Figure 2, panel d, in Morcos and Harvey (2016) was kindly provided by A.S. Morcos and C.D. Harvey. We then calculated the weight decay ratio as previously described (**Materials and Methods** and **Results, Fig. 3C**). Arrowheads, median.

|                                                                     | T1                  | T2                  | T3                                   | T4                                          | T5                                             | T6                                             | T7                                             | T8                                                       | T9                                             | T10                                            | T11                                            |
|---------------------------------------------------------------------|---------------------|---------------------|--------------------------------------|---------------------------------------------|------------------------------------------------|------------------------------------------------|------------------------------------------------|----------------------------------------------------------|------------------------------------------------|------------------------------------------------|------------------------------------------------|
| <b>Total length (cm)</b>                                            | 60                  | 170                 | 270                                  | 330                                         | 330                                            | 330                                            | 330                                            | 330                                                      | 330                                            | 330                                            | 330                                            |
| <b>Cue period (cm)</b>                                              | 45                  | 120                 | 220                                  | 280                                         | 280                                            | 240                                            | 200                                            | 200                                                      | 200                                            | 200                                            | 200                                            |
| <b>Delay (cm)</b>                                                   | 10                  | 20                  | 20                                   | 20                                          | 20                                             | 60                                             | 100                                            | 100                                                      | 100                                            | 100                                            | 100                                            |
| <b>Tower density (m<sup>-1</sup>)</b>                               | 3.0                 | 3.8                 | 3.8                                  | 3.8                                         | 4.2                                            | 4.2                                            | 4.2                                            | 4.5                                                      | 4.8                                            | 4.8                                            | 5.0                                            |
| <b>Tower duration (ms)</b>                                          | Inf                 | Inf                 | Inf                                  | Inf                                         | Inf                                            | Inf                                            | Inf                                            | Inf                                                      | Inf                                            | 200                                            | 200                                            |
| <b>Tower visible from (cm)</b>                                      | 10                  | 10                  | 10                                   | 10                                          | 10                                             | 10                                             | 10                                             | 10                                                       | 10                                             | 10                                             | 10                                             |
| <b>Visual guide?</b>                                                | Y                   | Y                   | Y                                    | Y                                           | N                                              | N                                              | N                                              | N                                                        | N                                              | N                                              | N                                              |
| <b>Tower side ratio (m<sup>-1</sup>)</b>                            | Inf                 | Inf                 | Inf                                  | Inf                                         | Inf                                            | Inf                                            | Inf                                            | 8.3:0.7                                                  | 8.0:1.6                                        | 8.0:1.6                                        | 7.7:2.3                                        |
| <b>Warm-up</b>                                                      | none                | none                | none                                 | none                                        | 30 T4 trials with < 10% bias and > 80% correct | 30 T4 trials with < 10% bias and > 80% correct | 30 T4 trials with < 10% bias and > 80% correct | 10 T4 and 15 T7 trials with < 10% bias and > 80% correct | 10 T4 trials with < 10% bias and > 85% correct | 10 T4 trials with < 10% bias and > 85% correct | 10 T4 trials with < 10% bias and > 85% correct |
| <b>Advancement criteria</b>                                         | 10 completed trials | 40 completed trials | 80 completed trials at > 60% correct | 2 sessions with 100 trials at > 90% correct | 1 session with 100 trials at > 80% correct     | 1 session with 100 trials at > 80% correct     | 1 session with 100 trials at > 80% correct     | 1 session with 100 trials at > 75% correct               | 1 session with 100 trials at > 70% correct     | 1 session with 100 trials at > 70% correct     | n/a                                            |
| <b>Easy blocks</b><br>(performance calculated over 40-trial window) | none                | none                | none                                 | none                                        | 10 T4 trials if < 70% correct                  | 10 T4 trials if < 70% correct                  | 10 T4 trials if < 70% correct                  | 10 T4 trials if < 65% correct                            | 10 T7 trials if < 60% correct                  | 10 T7 trials if < 60% correct                  | 10 T7 trials if < 55% correct                  |

**Supplementary Table 1** | Detailed parameters for all shaping mazes and main accumulation maze.



**Supplementary Movie 1. Playback of six example trials from the accumulating-towers task.**

**Left:** flattened view of the mice's perspective as they navigated the maze. The red lines indicate the estimated boundaries of the binocular field ( $\pm 17.5^\circ$  at the horizon), and the yellow lines indicate  $\pm 45^\circ$  for reference.  $\theta$ : view angle. Negative numbers indicate left side by convention. Luminance has been increased for convenience. **Right:** equivalent top-down view of the virtual maze. The mouse avatar turns according to its recorded virtual view angle, and towers become gray outlines when they disappear from the maze. Movie has been slowed down by 2x.

## Supplementary Methods

### Spatial Poisson distribution of tower locations

We used the following algorithm to randomly generate tower placement locations according to a Poisson process, i.e. with exponentially distributed inter-tower spacings subject to a minimum interval between towers:

---

**Algorithm 1: *Spatial Poisson process with refractory interval***

---

*Inputs*  $L$  : Maximum possible location towers  
 $dy$  : Minimum possible spacing between towers  
 $\mu$  : Mean number of towers

*Outputs*  $y$  : A list of locations of towers. Will be distributed in the range  $[0,L]$

|   |                                                                                  |                                                                                                                 |
|---|----------------------------------------------------------------------------------|-----------------------------------------------------------------------------------------------------------------|
| 1 | $\max N \leftarrow \lfloor L/dy \rfloor$                                         | Draw a random Poisson distributed number that is less than the maximum possible (given the refractory interval) |
| 2 | do<br>$n \leftarrow \text{random}(\text{Poisson}(\mu))$<br>until $n \leq \max N$ |                                                                                                                 |
| 3 | $L_{\text{effective}} \leftarrow L - (n-1)*dy$                                   | Randomly distribute locations within $[0,L]$ , but impose a minimum separation                                  |
| 4 | $y \leftarrow \text{random}(\text{Uniform}(0, L_{\text{effective}}))$            |                                                                                                                 |
| 5 | $y \leftarrow \text{sort}(y)$                                                    |                                                                                                                 |
| 6 | $y \leftarrow y * L_{\text{effective}} + (0:n)*dy$                               |                                                                                                                 |
| 7 | $y \leftarrow y + \text{random}(\text{Uniform}(0, L))$                           | Randomly rotate to get rid of edge artifacts (non-uniform probability of 0 and L values)                        |
| 8 | $y[y > L] \leftarrow y[y > L] - L$                                               |                                                                                                                 |

---

### Exponential gain for translating treadmill movements into changes in virtual view angle

Learning to use a spherical treadmill to execute navigational movements in virtual reality constitutes a substantial portion of the training time for this task. One of the optimizations we have performed to ease this process is to select treadmill-to-virtual-movement transformations so that mice can execute smooth motions without spending aversive amounts of time during turns into the arms of the T-maze. Historically we had first utilized a constant gain (Harvey et al. 2012) for the , but when this gain was low mice required a large amount of time to turn into the arms, encouraging them to initiate turns early (at the expense of accumulating later cues).

Conversely, when this gain was high, small postural shifts in the stem of the T-maze caused the virtual scene to wobble, which was undesirable in a task involving visual cues. These observations motivated the use of a nonlinear gain function that deemphasizes small, uncontrollable movements of the treadmill during running down the stem, but facilitates sharper turns at the end of the T-maze to encourage straighter view angle trajectories.

### Heuristic models: optimization technique

Here we defined several models where the choice of the mouse in a series of trials is assumed to be a Bernoulli process parameterized by a probability of making a choice to the right,  $p_R = p_R(\vec{x})$ , that depends on a set of trial-specific quantities  $\vec{x}$  (see **Materials and Methods**).

We obtained best-fit parameters for each model by maximizing the log likelihood of the model for a given dataset comprising of  $m$  trials. Let the mouse's choice on the  $i^{\text{th}}$  trial be  $c_i, i = 1, \dots, m$  which is 1 (0) if the mouse chose right (left), then the likelihood of observing this choice is given by the binomial distribution  $B(1, p_R) = p_R(\vec{x}_i)^{c_i} [1 - p_R(\vec{x}_i)]^{1-c_i}$ . Taking the product of individual-trial likelihoods we obtain:

$$\ln L_x = \sum_{1 \leq i \leq m} \{c_i p_R(\vec{x}_i) \ln p_R(\vec{x}_i) + (1 - c_i) \ln[1 - p_R(\vec{x}_i)]\}$$

Additionally we subtracted L1 penalty terms for all free parameters of the model. For a model that includes all factors, the quantity that is maximized is therefore:

$$\ln L = \ln L_x - \lambda (\|\vec{\beta}_\Delta\|_1 + \|\beta_m\|_1 + \|\vec{\beta}_h\|_1)$$

where  $\|\vec{y}\|_1 \equiv \sum_i |y_i|$  is the L1 norm. This regularization is used as a method for selecting the most parsimonious model in terms of driving coefficients to zero when they do not result in a significantly better fit for the model (Schmidt, 2010). It was also crucial for some models, particularly those that contain history-dependent lapse terms, because of the presence of multiple local maxima that made the problem otherwise ill-posed.

The regularization strength hyperparameter  $\lambda$  was determined by using a 3-fold cross-validation (CV) procedure to find the optimal model in terms of predictive power. A given dataset was first divided into thirds, and each third is used exactly once as a test set and the remaining two thirds as its complementary training set. To equalize the highly different scales of the  $\vec{\Delta}$  factors compared to the rest of the factors which are bounded within  $[-1, 1]$ , for each coordinate the standard deviation  $\sigma_i = \sqrt{\langle (\Delta_i - \mu_i)^2 \rangle / (m_{2/3} - 1)}$  was computed using the  $m_{2/3}$  trials in the training set, and used to scale the evidence factors,  $\Delta_i \rightarrow \Delta_i / \sigma_i$ . In other words, the only thing that this changed was that the coefficients  $\vec{\beta}_\Delta$  were expressed in units of  $1/\vec{\sigma}$  where  $\vec{\sigma}$  are constants derived using the training set (the same are used for the test set, as it would be unfair use of information if they were re-derived for the test set).

### Alternative strategy models: one-random-tower analysis details

For the analysis in **Figure 4C**, for each mouse we selected the top 1 third performance blocks, and only analyzed mice that had at least 200 trials in these blocks; we pooled together all trials from these blocks and mice. To test the 1-random tower hypothesis, we reasoned that we expect to obtain a linear psychometric curve when the sum of towers ( $\#R+\#L$ ) was fixed for all trials. This is because the probability to go right for the 1-random tower strategy is given by  $\#R/(\#R+\#L)$ , and if the denominator is fixed, then the psychometric curve (which is given by  $(\#R-\#L)/(\#R+\#L)$ ) is linear in the difference of towers  $\#R-\#L$ , which is the standard x-axis of the psychometric curve. However, we have empirically observed sigmoid shapes for the psychometric curves of the mice's choices. Thus, we proceeded to quantify if the psychometric curves of the mice choices were different from that of the 1-random tower model (as described in **Materials and Methods**). To obtain a dataset with fixed  $\#R+\#L$ , we next selected only trials where  $\#R+\#L=12$ . This number was chosen because it was the maximum number of  $\#R+\#L$  for which there were at least 4000 trials. We then found the psychometric curve for the actual data and the 1-random tower model. As expected, the 1-random tower model results in a linear psychometric curve, whereas the actual data appears more sigmoidal. To find whether these curves are significantly different from each other, we performed a shuffling test in the following way: we generated 5000 bootstrapped pairs of curves by pooling for all trials with a given  $\#R - \#L$  the number of times the mice (or model) chose right, and then randomly assigning the same number of right choices between the two curves, while keeping the total number of trials as in the original data. The sum of absolute differences between the two curves was used as the test statistic.
